# Supplementary material for: A leukemia-protective germline variant mediates chromatin module formation via transcription factor nucleation
Source: PubMed Central journal article supplement (PMC9018852; doi:10.1038/s41467-022-29625-6), 2022-04-19
Supplement: 41467_2022_29625_MOESM1_ESM.pdf [file 41467_2022_29625_MOESM1_ESM.pdf]

## **SUPPLEMENTARY INFORMATION**

**Supplementary Figure 1.**  
**Supplementary Figure 2.**  
**Supplementary Figure 3.**  
**Supplementary Figure 4.**  
**Supplementary Figure 5.**  
**Supplementary Figure 6.**  
**Supplementary Figure 7.**  
**Supplementary Figure 8.**  
**Supplementary Figure 9.**

**Supplementary Table 1.**  
**Supplementary Table 2.**  
**Supplementary Table 3.**  
**Supplementary Table 4.**  
**Supplementary Table 5.**

## **SUPPLEMENTARY REFERENCES**

# Supplementary Fig. 1

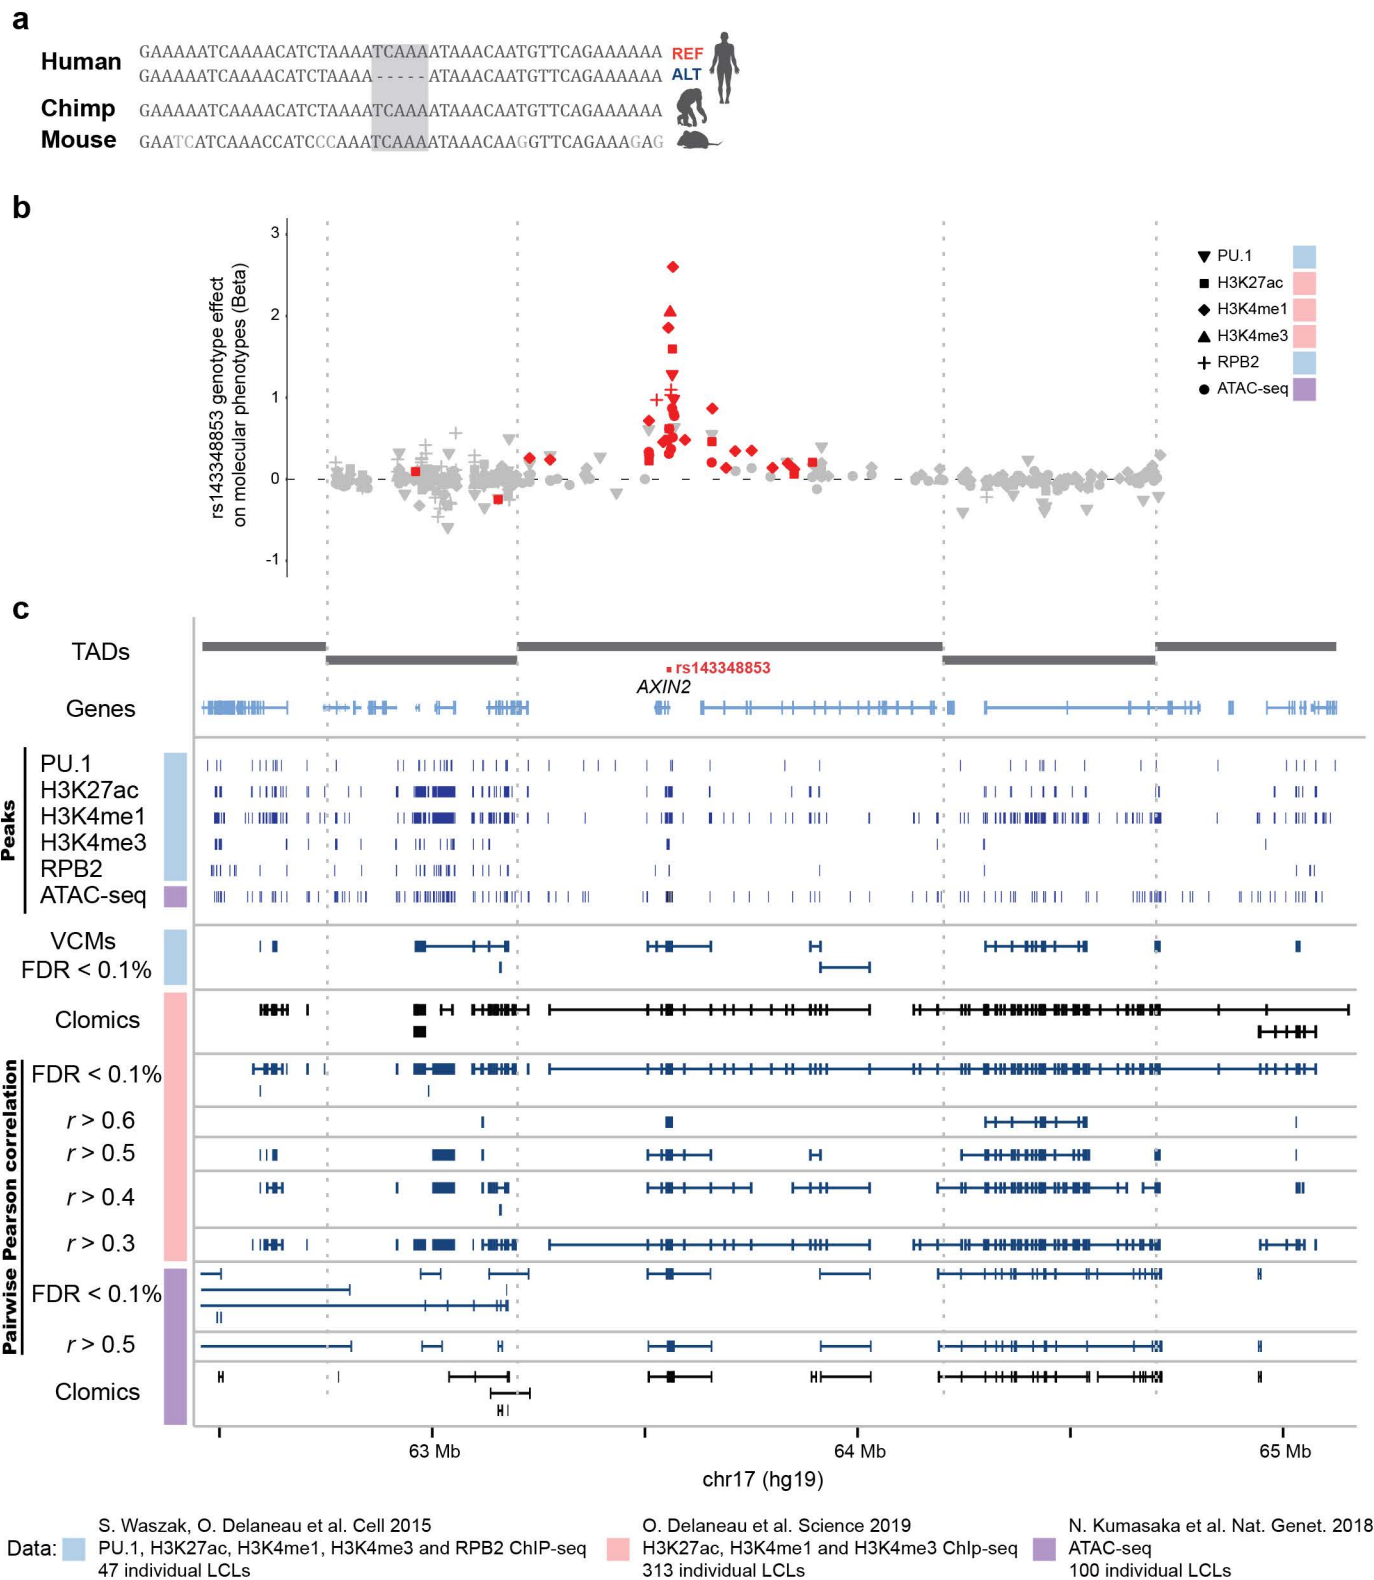

**Supplementary Fig. 1. *AXIN2* VCM characteristics.** **a** DNA sequences of the rs143348853 locus for human, chimp and mouse. **b** Beta values, obtained by a linear regression model, representing the genetic effect of rs143348853 for each studied molecular phenotype (FDR < 0.05 values colored in red). **c** IGV<sup>1</sup> view of the *AXIN2* locus showing GM12878 TADs<sup>2</sup>, meta peaks for all studied molecular phenotypes and VCMs calculated from different datasets using either Pearson correlation values between peak pairs with different thresholding methods ( $r$  coefficient or FDR value)<sup>3</sup> or a hierarchical clustering-based approach (Clomics)<sup>4</sup>.

Supplementary Fig. 2

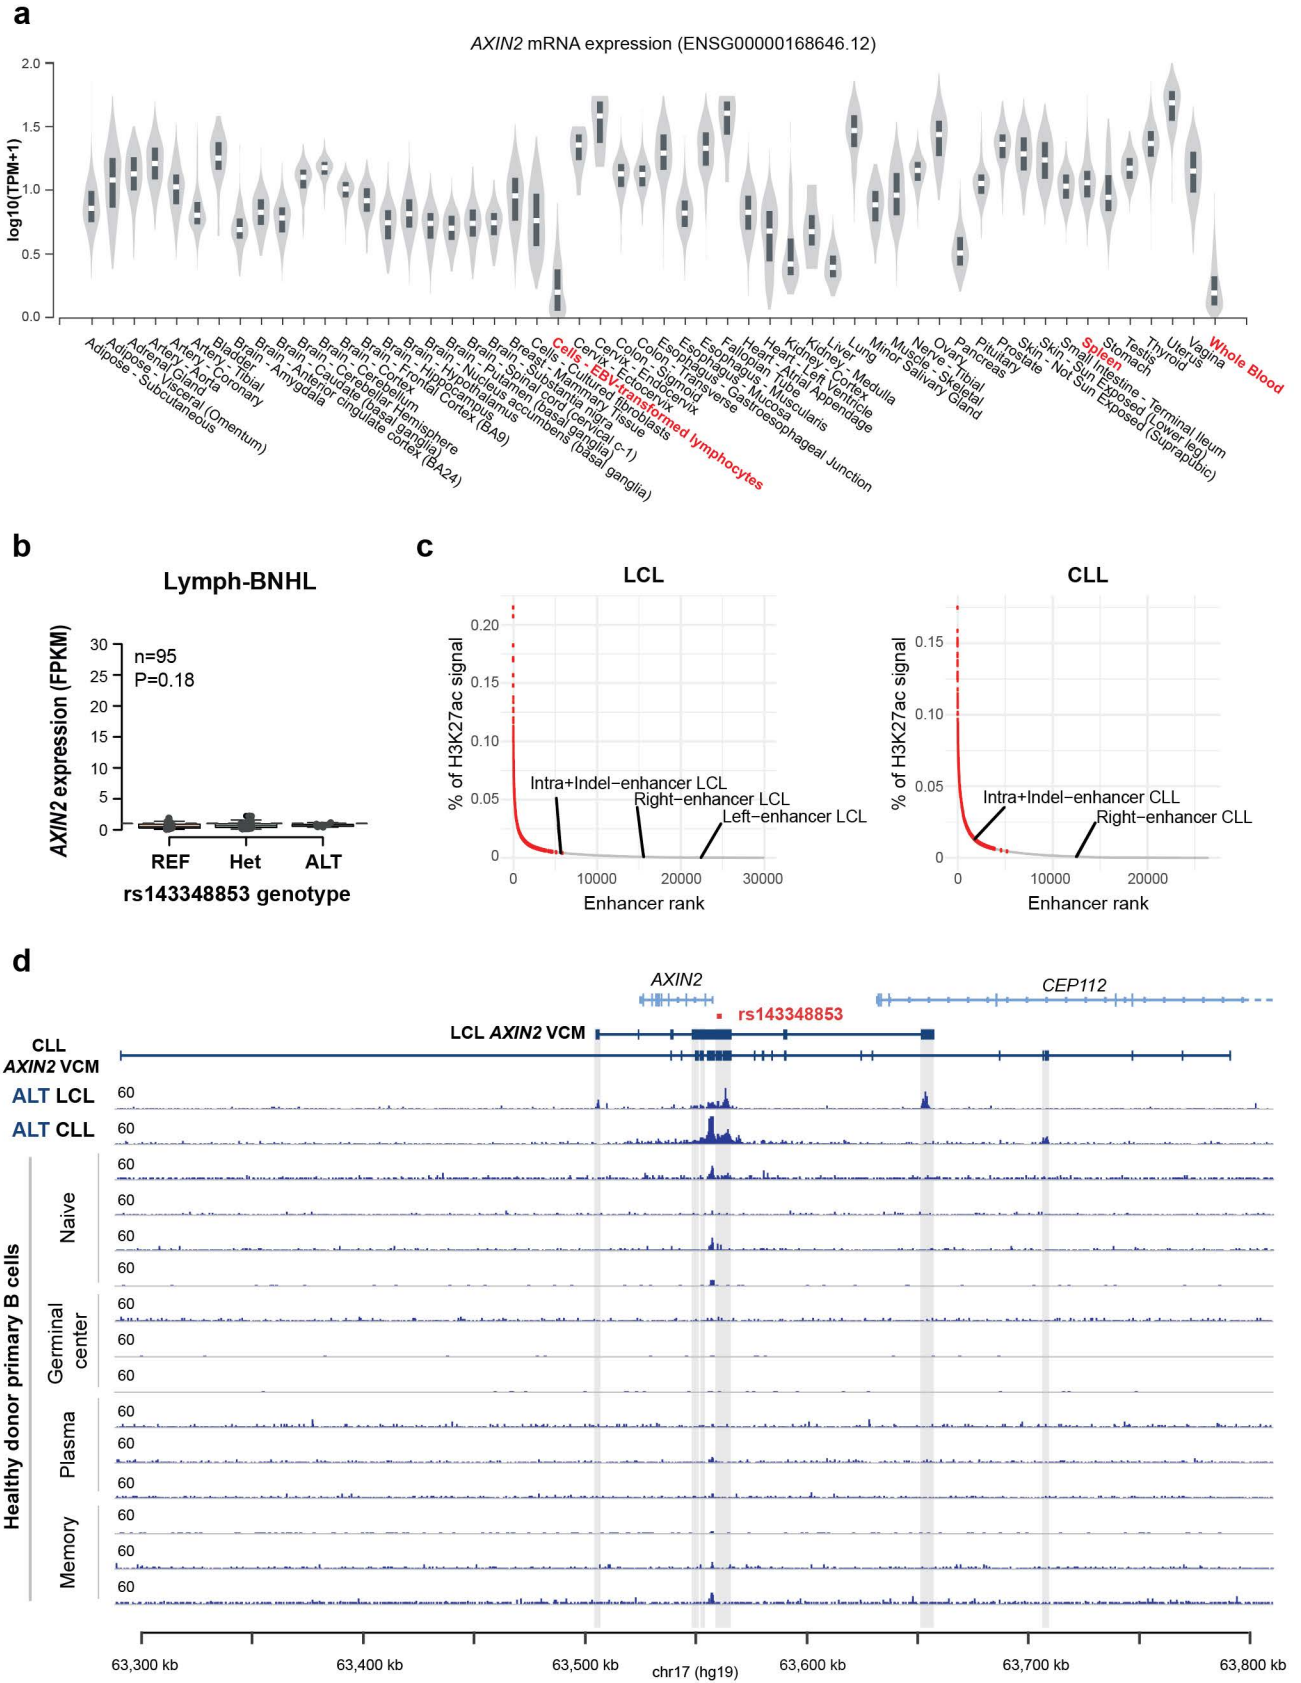

**Supplementary Fig. 2. *AXIN2* expression and H3K27ac enrichment across different cell types and rs143348853 genotypes.** **a** *AXIN2* mRNA expression across different cells or tissues from the GTEx portal (TPM accounts for transcripts per million). Significant hits (Bonferroni adjusted  $p$  value < 0.05) denoted in **Fig. 2a** are labelled in red. **b** *AXIN2* mRNA expression for the different rs143348853 genotypes of B cell Non-Hodgkin lymphoma (Lymph-BNHL) cells from PCAWG;  $n$  and  $P$  indicate the number of considered patients and nominal  $p$  value from a linear regression model, respectively. Boxes indicate the IQR (25-75%) and the box center indicates the median. Whiskers represent the minimum or maximum values of no further than 1.5 times the IQR for both the top and bottom of the box. **c** Rank-ordered enhancers based on H3K27ac signal from LCLs and CLLs. The average rank from four different homozygous ALT LCL and CLL cells was taken. Enhancers denoted as super-enhancers for at least one individual by ROSE2 are highlighted in red. **d** H3K27ac ChIP-seq signal across the *AXIN2* locus from an ALT LCL, an ALT CLL tumor and healthy donor primary B cells, to illustrate enhancer distribution differences among these B cell classes. The *AXIN2* LCL and CLL VCMs, as inferred using the pairwise correlation method, are also shown. Grey boxes indicate LCL and CLL enhancers.

# Supplementary Fig. 3

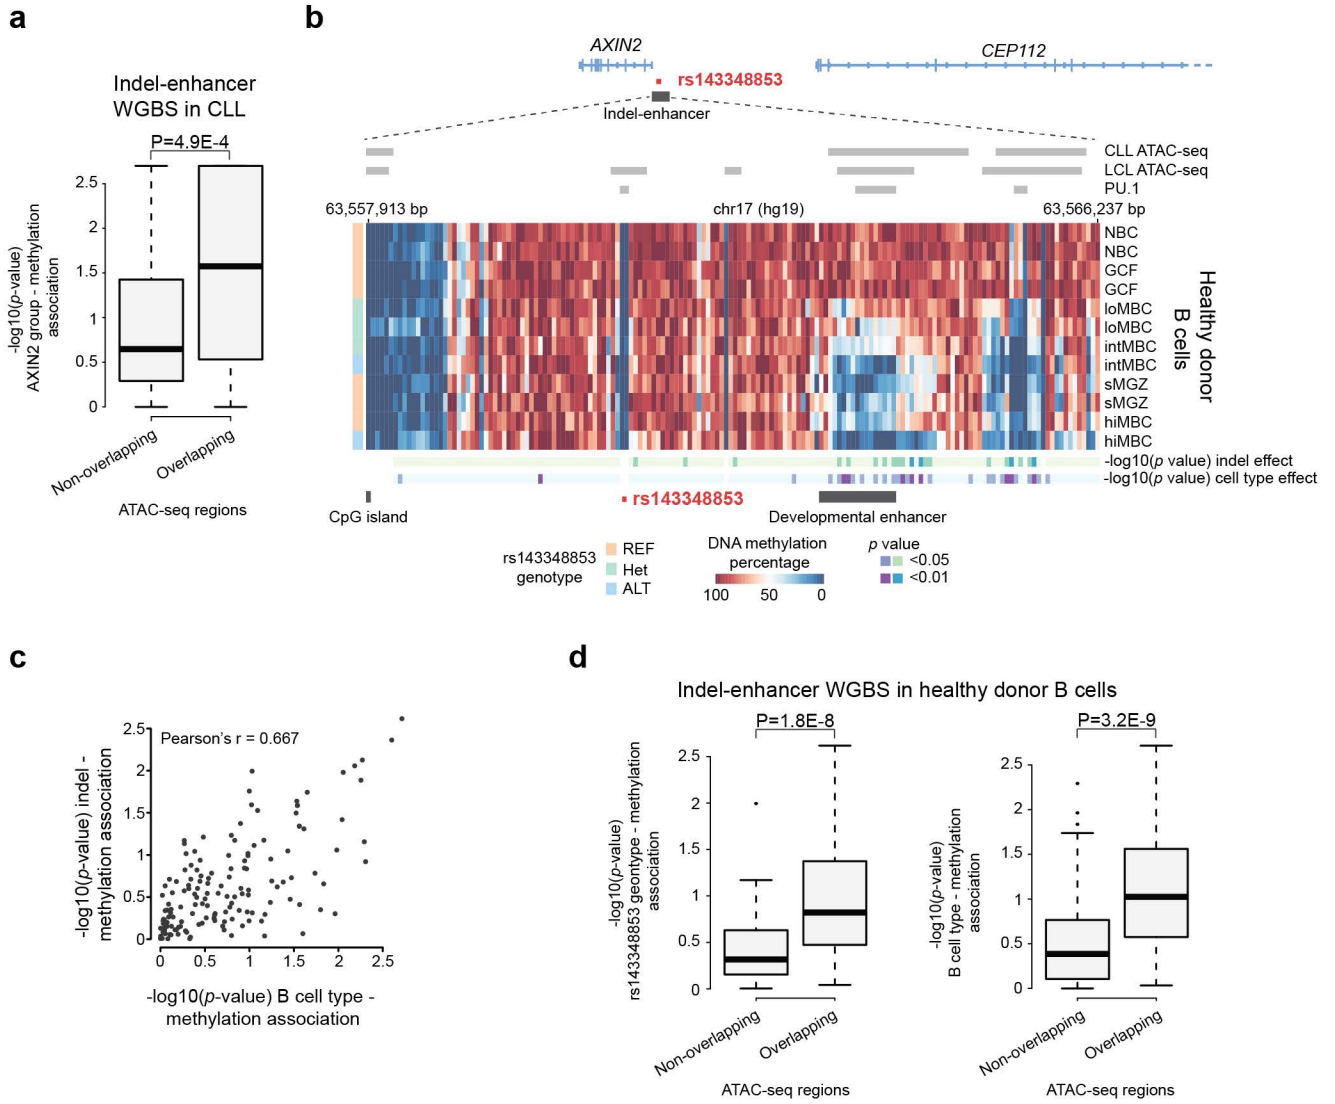

**Supplementary Fig. 3. Indel-enhancer predisposition to activation during B cell development.** **a**  $-\log_{10}(\text{nominal } p \text{ value})$  for each region from an *AXIN2* group-methylation association using a linear regression model in CLL is displayed and categorized as non-overlapping ( $n = 92$ ) or overlapping ( $n = 70$ ) ATAC-seq peaks (LCL and CLL merged peaks). Only regions embedded in the indel-enhancer were assessed.  $P$  indicates  $p$  value from a two-sided Wilcoxon test. Boxes indicate the IQR (25-75%) and the box center indicates the median. Whiskers represent the minimum or maximum values of no further than 1.5 times the IQR for both the top and bottom of the box. **b** DNA methylation on the indel-enhancer region from different B cell types during B cell development: naive (NBC), germinal center founder (GCF), early non-class-switched memory (loMBC), non-class-switched memory (intMBC), splenic marginal zone (sMZB) and class-switched memory (hiMBC) B cells. CLL and LCL ATAC-seq and LCL PU.1 peaks are displayed. CpG island coordinates were obtained from the UCSC Genome Browser. The region found to be in the top 5000 most hypomethylated regions in later stages of B cell development compared to NBCs<sup>5</sup> (i.e. developmental enhancer) is also denoted. Nominal  $p$  values, based on the rs143348853 genotype- or the cell type-methylation associations using a linear regression model, are denoted in the  $p$  value tracks. **c**  $-\log_{10}$  nominal  $p$  values for each region in the indel-enhancer from the rs143348853 genotype-methylation and B cell type-methylation associations, using a linear regression model. **d** Same as **a** but in healthy donor B cells for the rs143348853 genotype-methylation (left) and cell type-methylation (right) associations ( $n = 90$  for non-overlapping and  $n = 61$  for overlapping ATAC-seq peaks).  $P$  indicates  $p$  value from a two-sided Wilcoxon test. Boxes indicate the IQR (25-75%) and the box center indicates the median. Whiskers represent the minimum or maximum values of no further than 1.5 times the IQR for both the top and bottom of the box.

# Supplementary Fig. 4

**a**

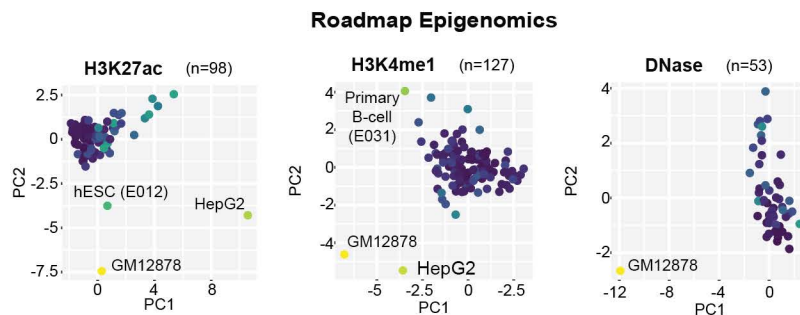

**b**

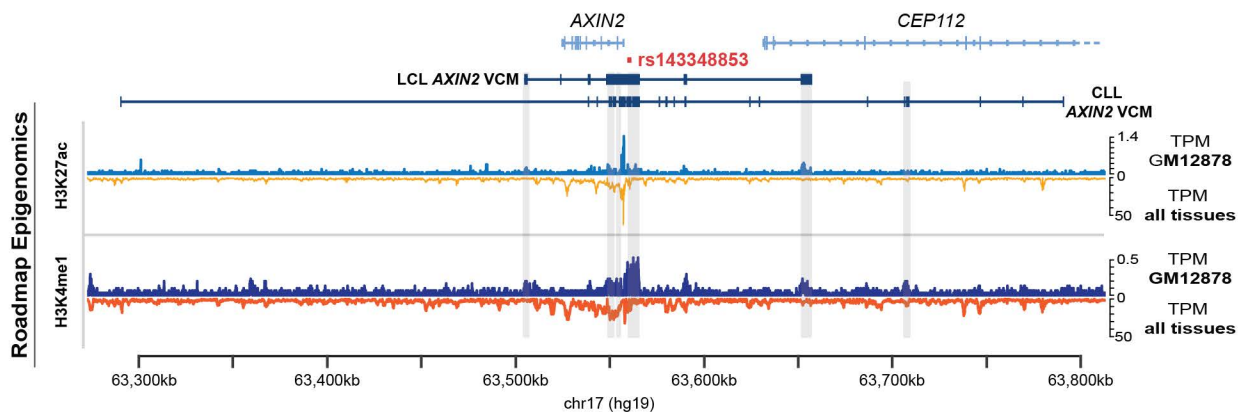

**c**

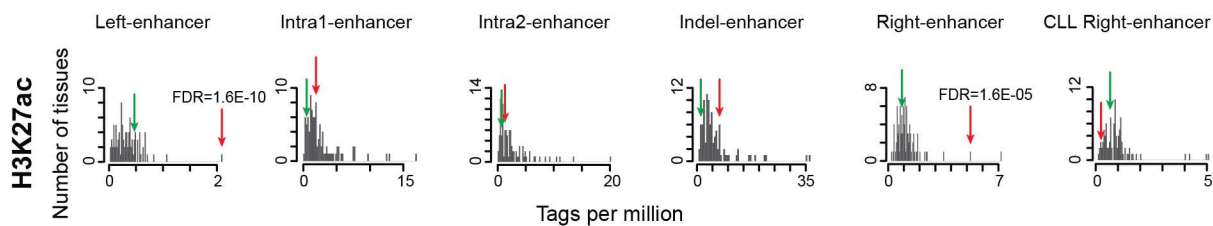

**d**

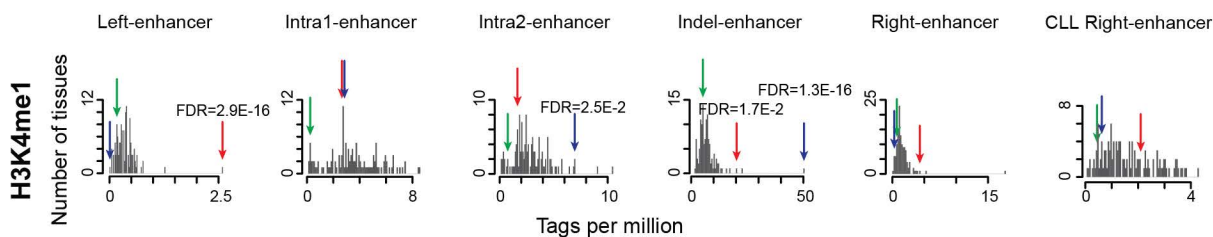

**e**

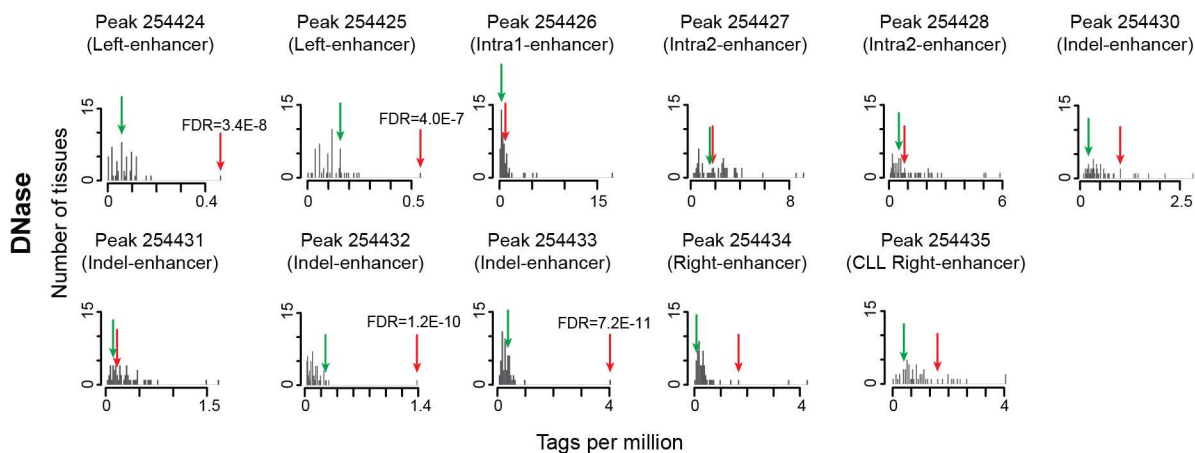

**f**

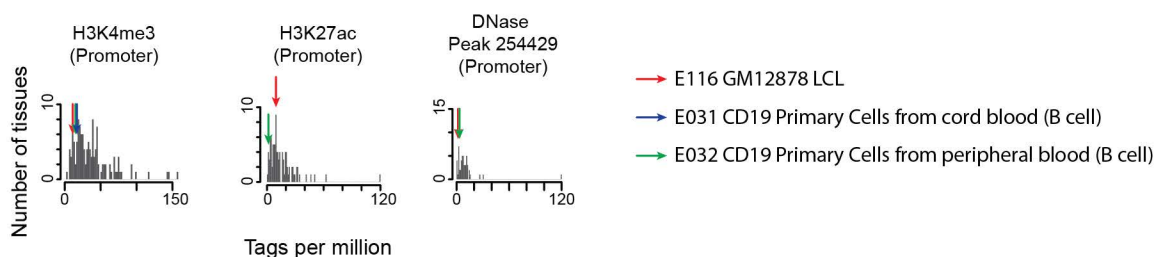



**Supplementary Fig. 4. Specificity of the *AXIN2* enhancer cluster.** **a** PCA plots showing enhancer composition dissimilarity based on H3K27ac, H3K4me1 and DNase signals from the Roadmap Epigenomics project data, colored according to the local outlier factor (LOF). The most distinguishable outliers are labelled (E031 indicates the cell type id provided by Roadmap). *n* indicates the number of considered tissues. **b** Genomic view of Roadmap H3K27ac and H3K4me1 signals as tags per million (TPM) for GM12878 and the sum of all different cell types. The LCL and CLL *AXIN2* VCM enhancer regions are marked with grey boxes. **c,d,e** Histogram representation of tags per million for all available tissue/cell types from Roadmap molecular phenotypes: H3K27ac (**c**), H3K4me1 (**d**) and DNase (**e**) on the different LCL and CLL *AXIN2* enhancers. For DNase, assessed regions represent LCL ATAC-seq peaks. **f** Roadmap H3K4me3, H3K27ac and DNase signals on the *AXIN2* promoter. Only B cell samples were considered for the enrichment test: GM12878 (E116) (red), CD19+ primary cells from cord blood (E031) (blue), CD19+ primary cells from peripheral blood (E032) (green). For **a-f**, cell ids as labelled by Roadmap. Significantly enriched hits (FDR < 0.05) are annotated with their FDR value, which indicates multiple testing corrected one-sided *p* value obtained from the R pnorm function.

Supplementary Fig. 5

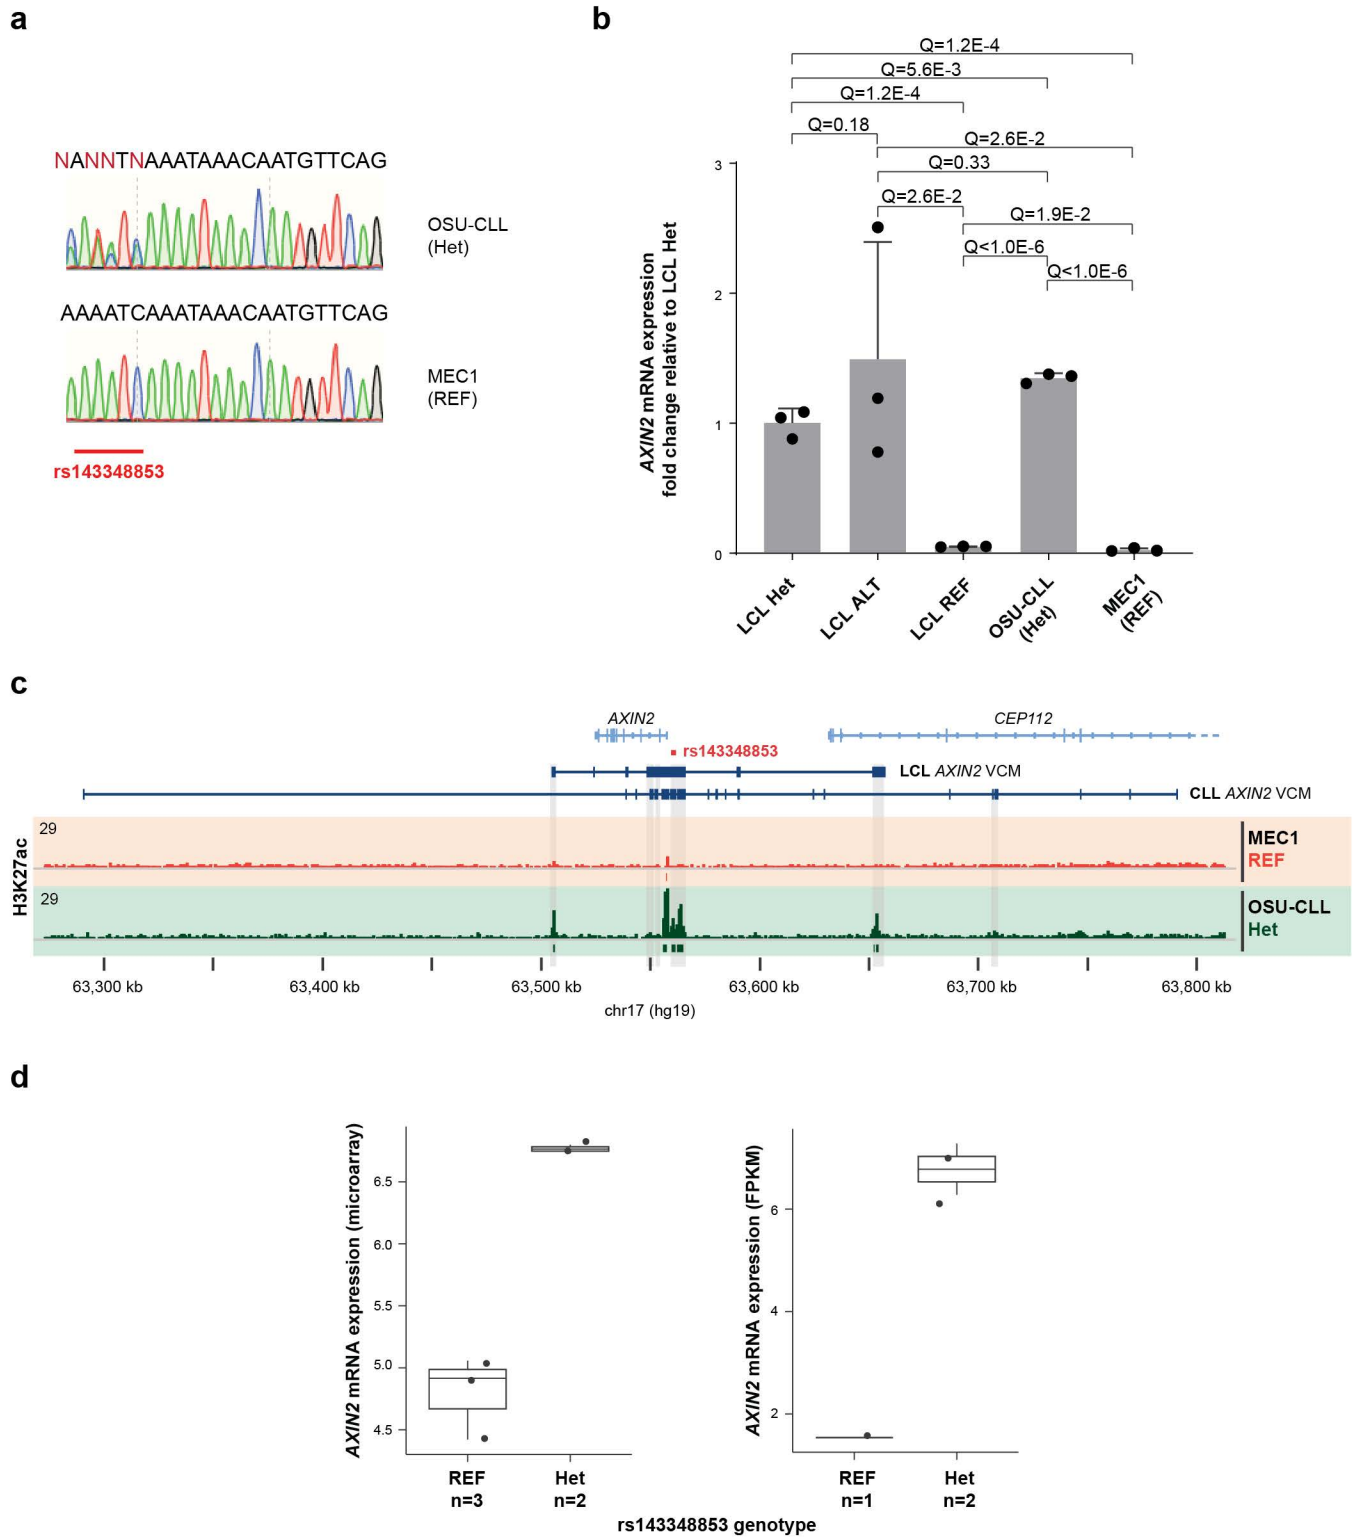

**Supplementary Fig. 5. OSU-CLL and MEC1 *AXIN2* expression and enhancer composition.** **a** Sanger sequencing results on the rs143348853 region from OSU-CLL and MEC1 genomic DNA. **b** *AXIN2* mRNA expression for the five cell lines studied in the project: LCL Het (GM12878), LCL homozygous REF (GM12282), GM11931 (homozygous ALT) and the two human CLL cell lines OSU-CLL and MEC1. Q indicate FDR corrected *p* value from an unpaired two-sided t-test with Welch's correction. Bar plots indicate mean  $\pm$ SD for *n* = 3 biological replicates. Source data are provided as a Source Data file. **c** H3K27ac signal profile and peaks for the MEC1 and OSU-CLL cell lines with their respective rs143348853 genotypes listed. The illustrated VCMs represent the LCL and CLL VCMs from the pairwise Pearson correlation method. Grey boxes indicate LCL and CLL enhancers. **d** *AXIN2* mRNA expression (microarray or RNA-seq based) for the PCAWG CLL patients with EBV infection. *n* indicates the number of considered patients. Boxes indicate the IQR (25-75%) and the box center indicates the median. Whiskers represent the minimum or maximum values of no further than 1.5 times the IQR for both the top and bottom of the box.

# Supplementary Fig. 6

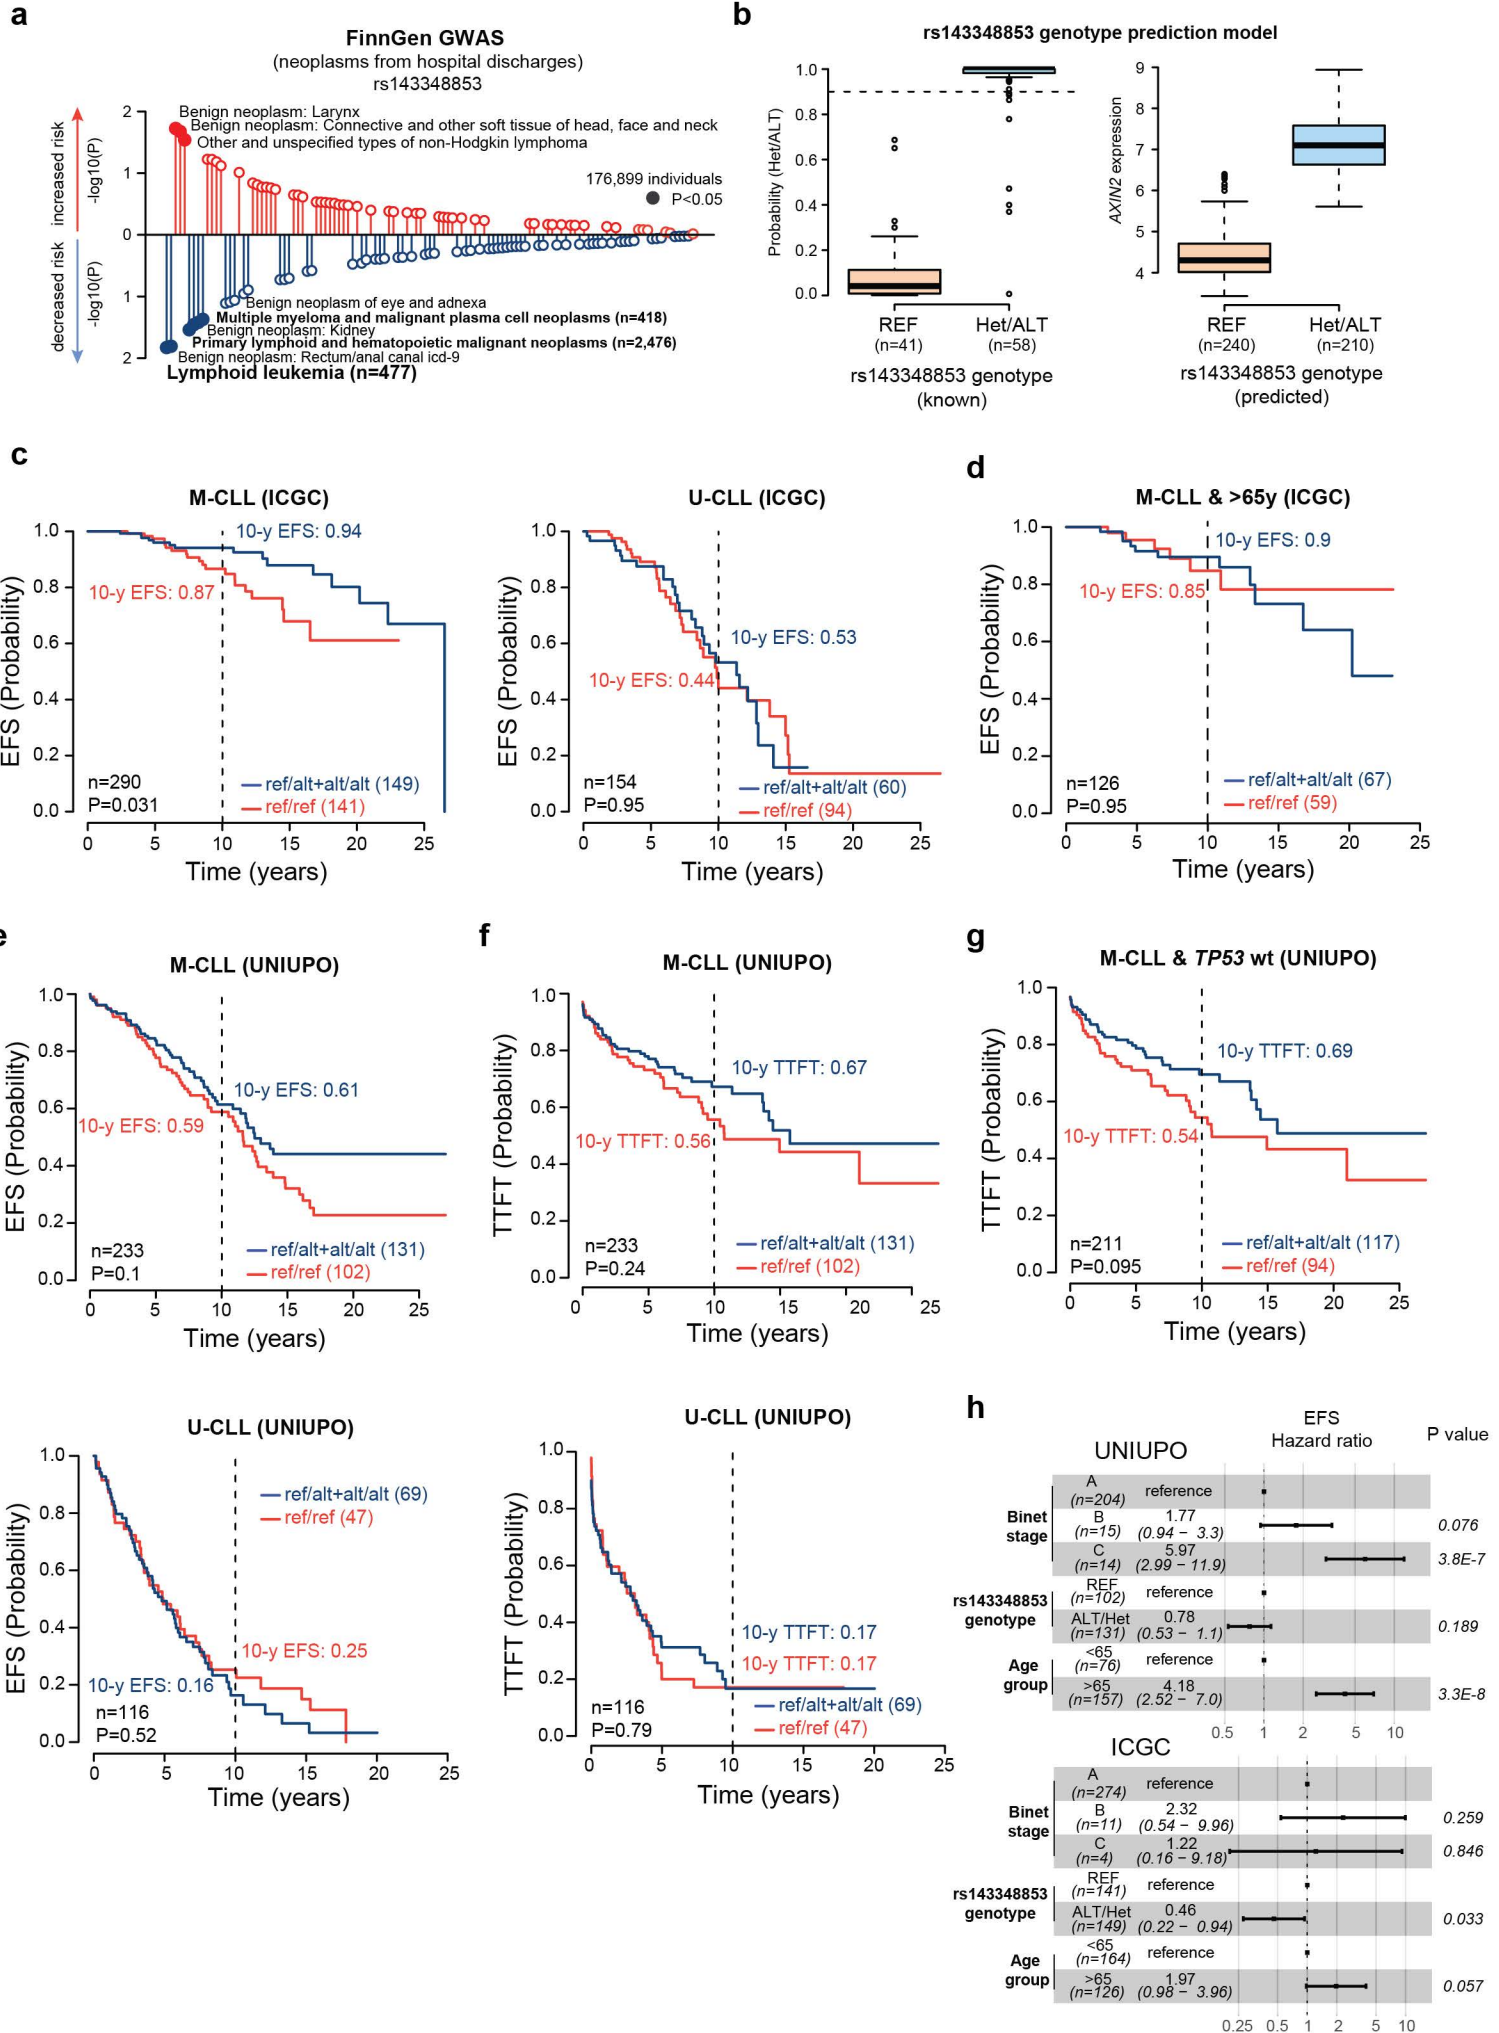

**Supplementary Fig. 6. FinnGen and CLL clinical data.** **a** Association between rs143348853 and benign/malignant neoplasms in FinnGen based on information from hospital discharges. *n* and *P* indicate the number of considered patients and nominal *p* value, respectively. **b** Logistic regression model to predict rs143348853 deletion (ref/alt + alt/alt) vs. non-deletion (ref/ref) carrier status from molecular CLL data in the ICGC CLL cohort. The left panel shows the deletion probability vs. known WGS-derived rs143348853 deletion carrier status. The right panel shows the relationship between inferred rs143348853 carrier status and *AXIN2* expression in the full ICGC CLL cohort. Boxes indicate the IQR (25-75%) and the box center indicates the median. Whiskers represent the minimum or maximum values of no further than 1.5 times the IQR for both the top and bottom of the box. **c** Association between rs143348853 deletion carrier status (ref/ref vs. ref/alt + alt/alt) and event-free survival (EFS) probability in M-CLL (left) and U-CLL (right). Data was obtained from the ICGC CLL-ES project<sup>6,7</sup>. *P* values are based on log-rank tests for the two groups and the probability of 10-year EFS is indicated. **d** Same as **c** but considering >65 year-old M-CLL patients only. **e** Same as **c** but for the UNIUPO CLL cohort (M-CLL, top) (U-CLL, bottom). **f** Same as **e** but considering the association between rs143348853 and TTFT. **g** Same as **f** but only considering low-risk (wild-type *TP53*) M-CLL patients. **h** EFS hazard ratios for M-CLL patients from both CLL cohorts obtained from a Cox proportional hazards regression model using as variates the Binet stage, the rs143348853 genotype and the age group. *n* and *P* indicate the number of considered patients and *p* value respectively.

# Supplementary Fig. 7

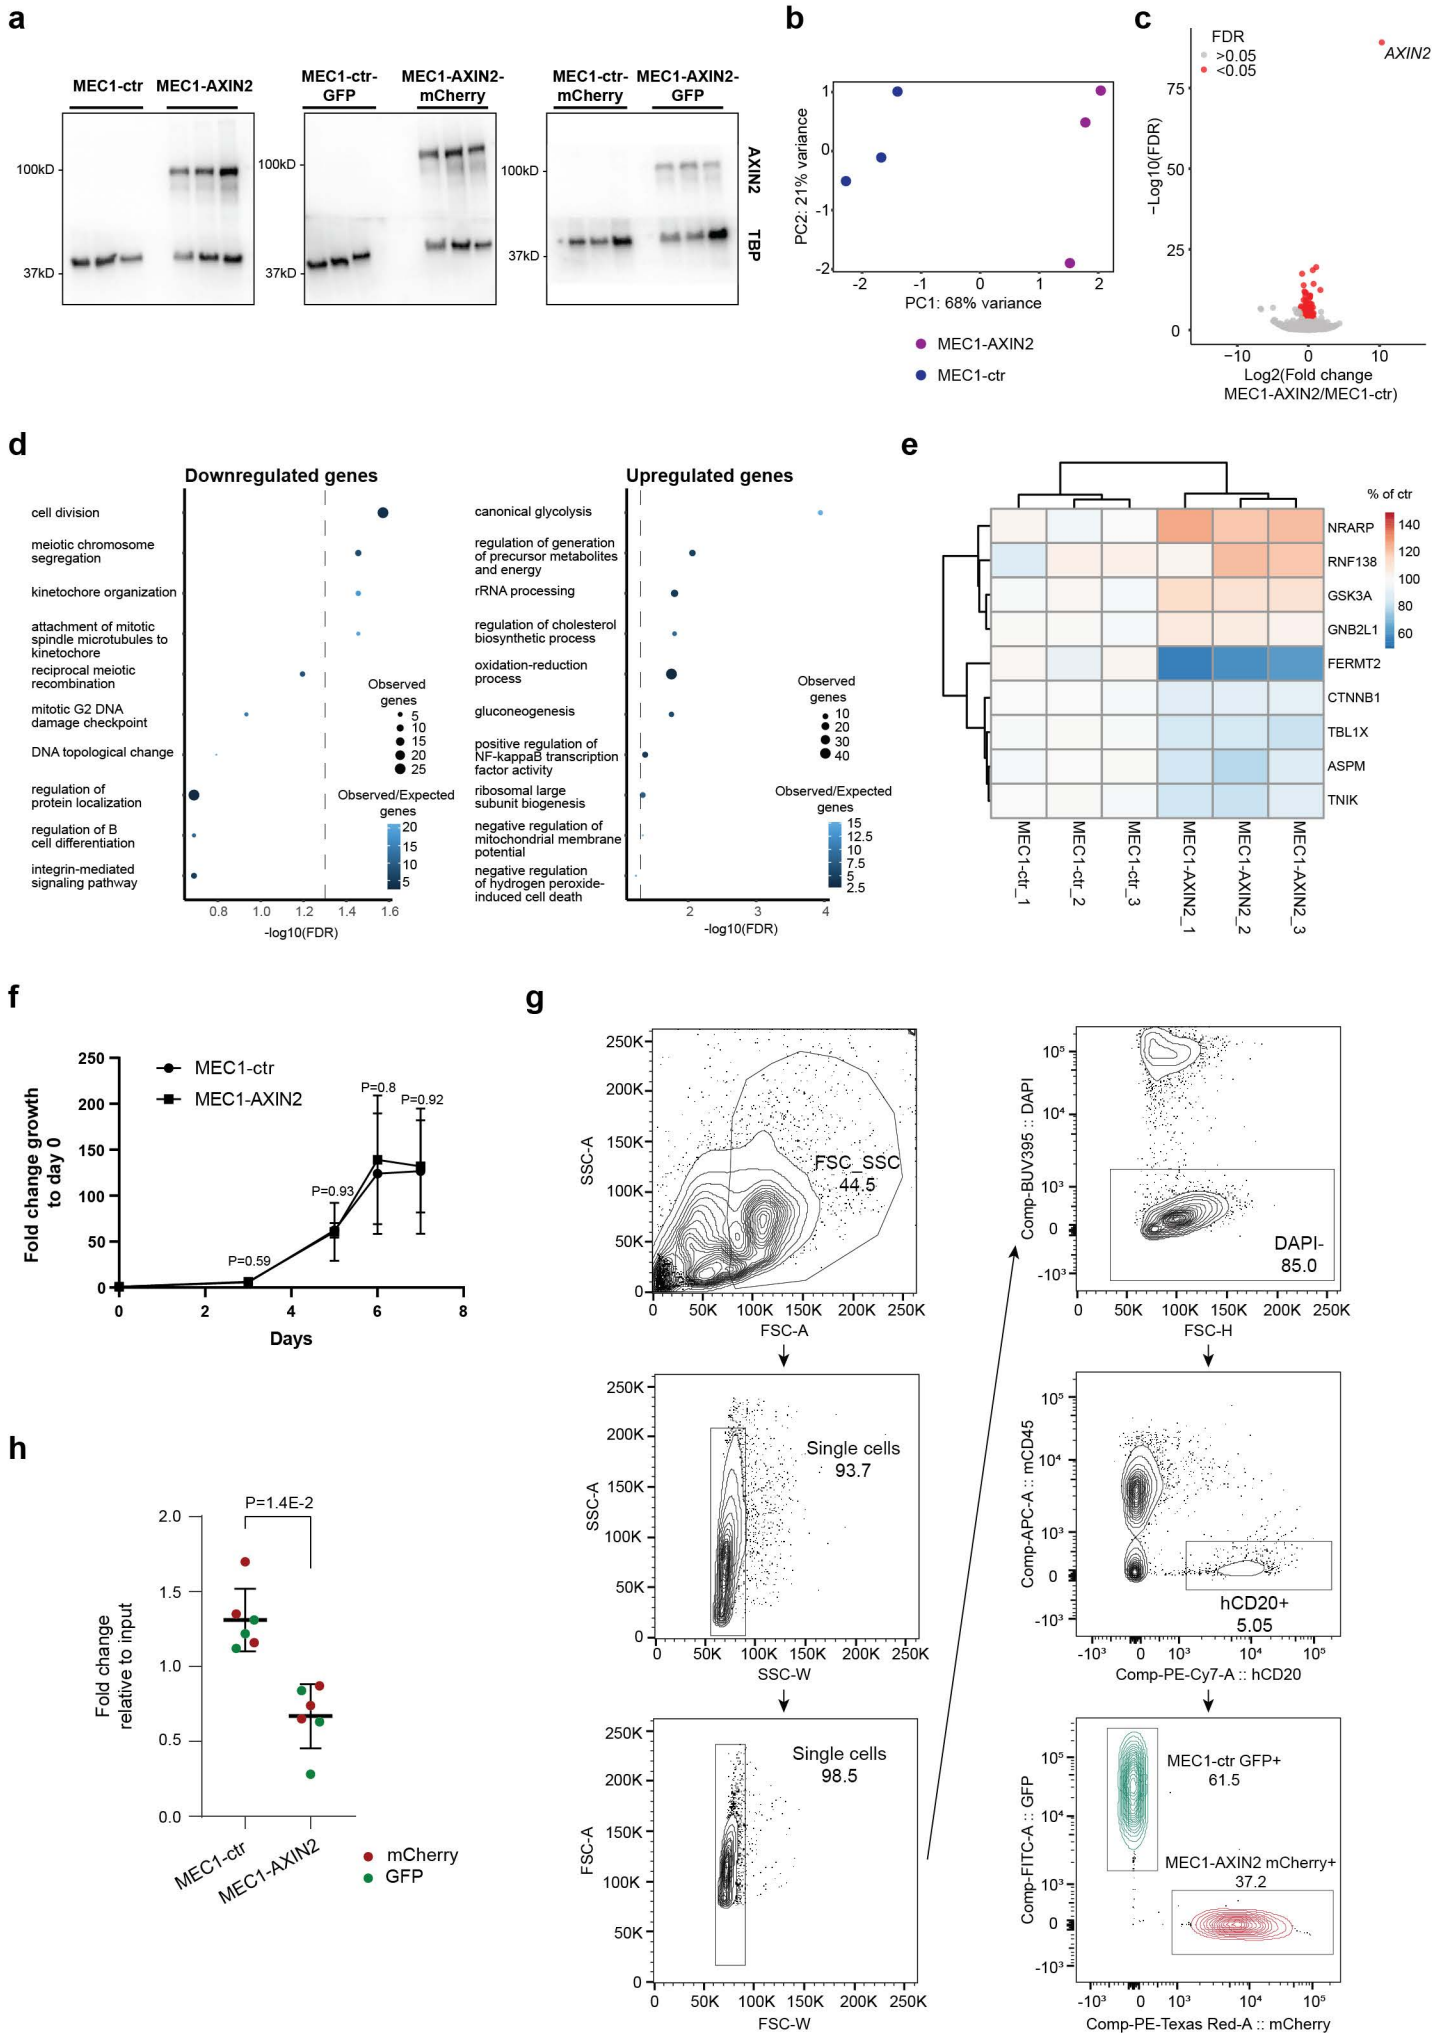

**Supplementary Fig. 7. Effect of AXIN2 (over)expression on MEC1 cells.** **a** AXIN2 protein level assessment by western blot for the AXIN2-overexpressing MEC1 cells from 3 replicates sampled at different days (for GFP or mCherry labelled and unlabelled MEC1 cells). **b** PCA results from MEC1-ctr and MEC1-AXIN2 RNA-seq data from three biological replicates. **c** Volcano plot of the log<sub>2</sub> fold gene expression change between MEC1-AXIN2 over MEC1-ctr cells; FDR < 0.05, differentially expressed genes are colored in red. **d** Gene ontology analysis results based on the above-described RNA-seq data, considering significantly differentially expressed genes (FDR < 0.05 and fold change different than 1). **e** Expression of significantly differentially expressed Wnt pathway genes from the RNA-seq data. Values on the heatmap represent the FPKM percentage over the FPKM mean of the control samples (MEC1-ctr, columns) for each gene (row). Dendrogram clustering based on Euclidean distances. **f** *In vitro* growth curve of MEC1-AXIN2 and MEC1-ctr cells. The plot shows the fold change respective to day 0 mean  $\pm$ SD values for the three biological replicates. Measurements were taken on days 3, 5, 6 and 7 after seeding. P indicates *p* value from a two-sided unpaired Welch corrected t-test. **g** Flow cytometry gating strategy on MEC1 cells extracted from the mouse bone marrow from the *in vivo* competition experiment. **h** Fold change of the final cell percentage (day 25-26) with respect to the input percentage (day 0) of MEC1-AXIN2 mCherry+, MEC1-ctr GFP+, MEC1-AXIN2 GFP+, and MEC1-ctr mCherry+ cells from the *in vivo* competitive experiment to test the effect of the fluorescent proteins on MEC1 cell proliferation *in vivo*; the mean  $\pm$ SD across all 6 mice is displayed, *p* value calculated with a paired two-sided t-test. For **a** and **h**, source data are provided as a Source Data file.

# Supplementary Fig. 8

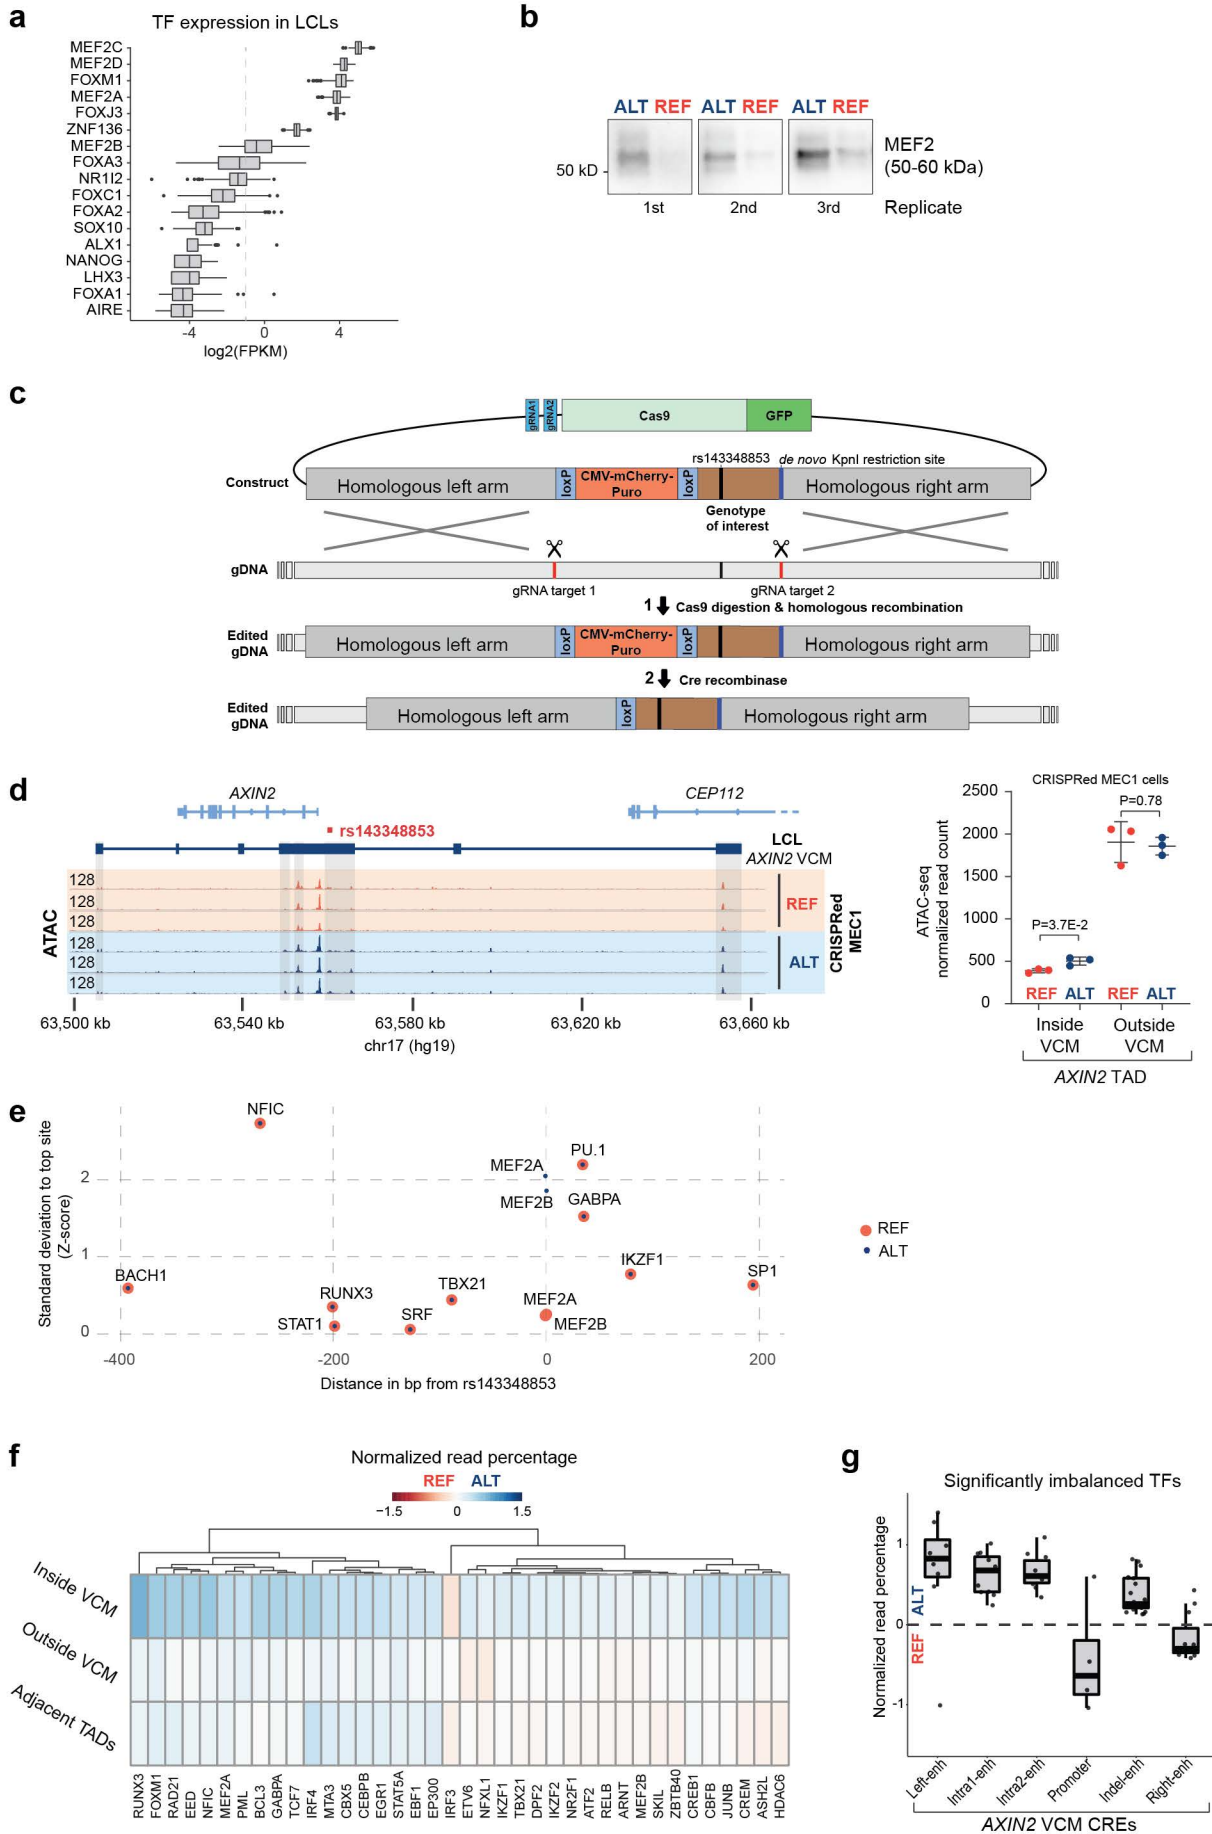



**Supplementary Fig. 8. CRISPR/Cas9 experimental design and AXIN2 VCM significantly imbalanced TFs.** **a** mRNA expression levels of TF candidates identified in **Fig. 4a** from  $n = 327$  individual LCLs. The dashed line represents the 0.5 FPKM threshold. Boxes indicate the IQR (25-75%) and the box center indicates the median. Whiskers represent de minimum or maximum values of no further than 1.5 times the IQR for both the top and bottom of the box. **b** *In vitro* DNA pulldown followed by WB with MEF2 antibody performed in three replicates. **c** Strategy to modify the MEC1 genotype with one single plasmid encoding all the required elements: Cas9-GFP, two gRNAs and the selection cassette containing the desired genetic alteration (REF, ALT, ALT.PU.1 $\Delta$  or MEF2 $\Delta$ ) surrounded by the homologous arms. **d** ATAC-seq signal on the AXIN2 VCM region of CRISPRed MEC1 cells for the  $n = 3$  biological replicates (left) and the normalized read sum (mean  $\pm$ SD) of all peaks embedded in or outside the AXIN2 VCM (right). P indicates the  $p$  value of a two-sided t-test. **e** DNA motif Z-score distribution (i.e. standard deviation) across the indel-enhancer of TFs that appeared significantly imbalanced on the indel-enhancer (in addition to PU.1). **f** Percentage of ALT reads of significantly imbalanced TFs in the AXIN2 LCL VCM region. Dendrogram clustering based on Euclidean distances. The percentage of reads for each TF is shown for: inside, outside VCM and adjacent TADs for comparison purposes. **g** Percentage of ALT reads from significantly imbalanced TFs for each CRE embedded in the AXIN2 LCL VCM: left-enhancer ( $n = 8$ ), intra1-enhancer ( $n = 11$ ), intra2-enhancer ( $n = 10$ ), promoter ( $n = 4$ ), indel-enhancer ( $n = 21$ ) and right-enhancer ( $n = 11$ ), where  $n$  indicates significantly imbalanced TFs. Boxes indicate the IQR (25-75%) and the box center indicates the median. Whiskers represent de minimum or maximum values of no further than 1.5 times the IQR for both the top and bottom of the box. In **f** and **g**, the percentage of ALT associated reads is displayed as the log<sub>2</sub> fold change of ALT read percentage of a TF over the ALT read percentage of the input. For **b** and **d**, source data are provided as a Source Data file.

# Supplementary Fig. 9

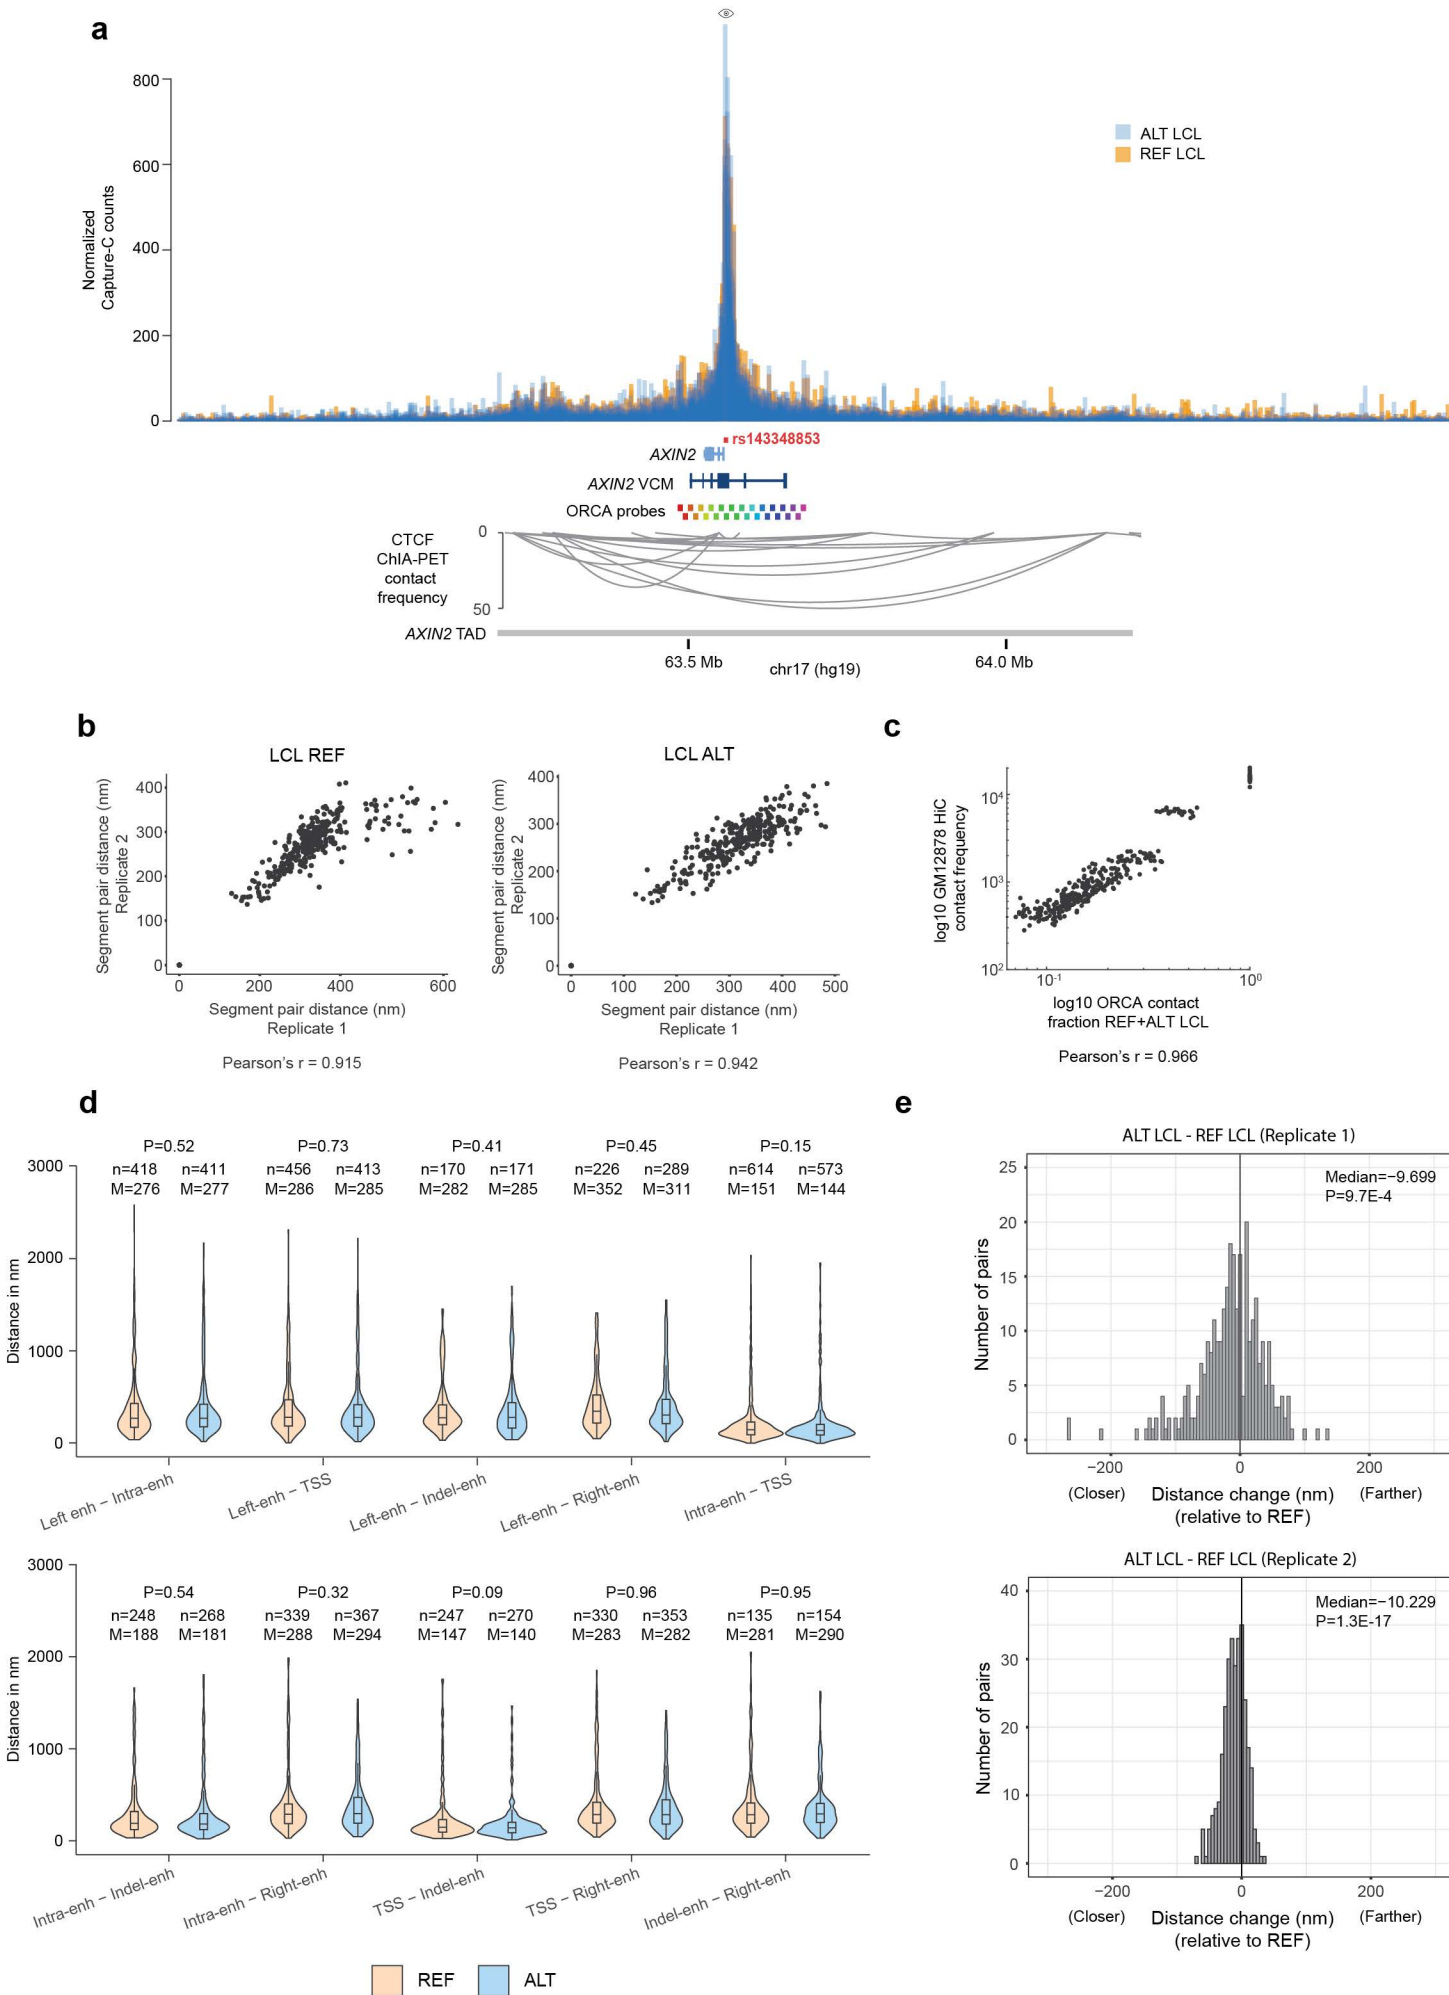

**Supplementary Fig. 9. Chromatin architecture characteristics of the *AXIN2* VCM region.**

**a** Histogram of the TAD-normalized Capture-C counts from merged replicates for the ALT and REF LCLs. The viewpoint is marked with an eye (indel). Below, the GM12878 *AXIN2* TAD<sup>2</sup> and the GM12878 CTCF ChIA-PET interactions<sup>8</sup> are also displayed for comparison purposes. **b** Scatter plot to illustrate the correlation between ORCA replicate 1 and 2 for both LCLs. **c** Scatter plot to illustrate the correlation between the log<sub>10</sub> ORCA contact fraction <150 nm of merged REF and ALT LCL data and the log<sub>10</sub> GM12878 HiC contact frequency. **d** Distribution of the distance (nm) on REF and ALT LCLs between ORCA segments corresponding to LCL *AXIN2* CREs. P indicates nominal *p* values from a two-sided Wilcoxon test. *n* and *M* represent the number of considered single cells and population-median distance, respectively. Boxes indicate the IQR (25-75%) and the box center indicates the median. Whiskers represent de minimum or maximum values of no further than 1.5 times the IQR for both the top and bottom of the box. **e** Histograms showing the differences between pairs of ORCA segments of population-median distances of REF and ALT alleles for each replicate. P indicates *p* value from a two-sided binomial test.

**Supplementary Table 1. LCL AXIN2 VCM and ChIP-seq peaks regions.** AXIN2 VCM information using the data from Waszak et al. 2015<sup>3</sup> and Delaneau et al. 2019<sup>4</sup>. The consensus AXIN2 VCM is the merged set of both VCMs. ChIP-seq peak genomic coordinates (1-based) for all molecular phenotypes and, PU.1 and RPB2 data are from Waszak et al. 2015<sup>3</sup>. H3K27ac, H3K4me1 and H3K4me3 ChIP-seq LCL extended data from Delaneau et al. 2019<sup>4</sup>. In bold, the peaks that overlap with the indel. In red, the peaks that overlap with a molecular phenotype of the consensus AXIN2 VCM but did not pass the 0.1% FDR or 0.5 Pearson's r threshold from the pairwise Pearson correlation themselves. Coordinates are for hg19. Feature name as described in this publication. The effect size of the ALT allele (Beta) and nominal *p* value of the association are based on a linear regression model.

| <b>Id</b>                                                                                                 | <b>Chr</b> | <b>Start</b>    | <b>End</b>      | <b>LCL AXIN2 VCM feature</b>                       | <b>Beta</b> | <b>P value</b> |
|-----------------------------------------------------------------------------------------------------------|------------|-----------------|-----------------|----------------------------------------------------|-------------|----------------|
| <b>LCL AXIN2 VCM regions</b><br>(Pairwise Pearson correlation FDR < 0.1%, Waszak et al., 2015 data)       |            |                 |                 |                                                    |             |                |
| 10748                                                                                                     | 17         | 63504776        | 63506884        | Left-enhancer                                      | <b>3.57</b> | <b>1.8E-8</b>  |
| 10748                                                                                                     | 17         | 63524026        | 63524225        | TTS                                                |             |                |
| 10748                                                                                                     | <b>17</b>  | <b>63548330</b> | <b>63566297</b> | Intra-enhancer, Promoter and <b>Indel-enhancer</b> |             |                |
| 10748                                                                                                     | 17         | 63651549        | 63657768        | Right-enhancer                                     |             |                |
| <b>LCL AXIN2 VCM regions</b><br>(Pairwise Pearson correlation <i>r</i> > 0.5, Delaneau et al., 2019 data) |            |                 |                 |                                                    |             |                |
| 6987                                                                                                      | 17         | 63504776        | 63506884        | Left-enhancer                                      | <b>4.56</b> | <b>3.7E-56</b> |
| 6987                                                                                                      | 17         | 63538483        | 63540256        | H3K4me1 satellite                                  |             |                |
| <b>6987</b>                                                                                               | <b>17</b>  | <b>63548330</b> | <b>63566297</b> | Intra-enhancer, Promoter and <b>Indel-enhancer</b> |             |                |
| 6987                                                                                                      | 17         | 63589645        | 63591417        | H3K4me1 satellite                                  |             |                |
| 6987                                                                                                      | 17         | 63651549        | 63657768        | Right-enhancer                                     |             |                |
| <b>AXIN2 VCM enhancer regions (H3K27ac and H3K4me1 overlap)</b>                                           |            |                 |                 |                                                    |             |                |
|                                                                                                           | 17         | 63504798        | 63506884        | Left-enhancer                                      |             |                |
|                                                                                                           | 17         | 63548904        | 63550765        | Intra1-enhancer                                    |             |                |
|                                                                                                           | 17         | 63552328        | 63553582        | Intra2-enhancer                                    |             |                |
|                                                                                                           | <b>17</b>  | <b>63557838</b> | <b>63566239</b> | <b>Indel-enhancer</b>                              |             |                |
|                                                                                                           | 17         | 63651879        | 63655493        | Right-enhancer                                     |             |                |
| <b>H3K27ac</b>                                                                                            |            |                 |                 |                                                    |             |                |
| <b>24440</b>                                                                                              | <b>17</b>  | <b>63504798</b> | <b>63506934</b> | <b>Left-enhancer</b>                               | <b>0.23</b> | <b>6.9E-11</b> |
| 22915                                                                                                     | 17         | 63548904        | 63550765        | Intra1-enhancer                                    | 0.5         | 4.9E-27        |
| 23484                                                                                                     | 17         | 63552328        | 63553582        | Intra2-enhancer                                    | 0.64        | 1.1E-22        |
| <b>19115</b>                                                                                              | <b>17</b>  | <b>63555248</b> | <b>63566297</b> | Promoter, <b>Indel-enhancer</b>                    | <b>1.66</b> | <b>7.0E-41</b> |

|                |           |                 |                 |                       |             |                |
|----------------|-----------|-----------------|-----------------|-----------------------|-------------|----------------|
| 19105          | 17        | 63651879        | 63655493        | Right-enhancer        | 0.47        | 1.6E-10        |
| <b>H3K4me3</b> |           |                 |                 |                       |             |                |
| 10908          | 17        | 63552286        | 63558834        | Promoter              | 2.24        | 6.6E-53        |
| <b>H3K4me1</b> |           |                 |                 |                       |             |                |
| 25114          | 17        | 63504776        | 63506884        | Left-enhancer         | 0.73        | 3.3E-24        |
| 30220          | 17        | 63538483        | 63540256        | H3K4me1 satellite     | 0.47        | 2.8E-20        |
| 30676          | 17        | 63548330        | 63554547        | Intra-enhancer        | 1.88        | 4.3E-40        |
| <b>23323</b>   | <b>17</b> | <b>63557838</b> | <b>63566239</b> | <b>Indel-enhancer</b> | <b>2.65</b> | <b>2.1E-48</b> |
| 32375          | 17        | 63589645        | 63591417        | H3K4me1 satellite     | 0.49        | 1.3E-18        |
| 29144          | 17        | 63651549        | 63657768        | Right-enhancer        | 0.9         | 2.1E-20        |
| <b>PU.1</b>    |           |                 |                 |                       |             |                |
| 218            | 17        | 63505247        | 63505446        | Left-enhancer         | 0.61        | 7.4E-03        |
| <b>1036</b>    | <b>17</b> | <b>63560245</b> | <b>63560444</b> | <b>Indel-enhancer</b> | <b>1.28</b> | <b>4.3E-12</b> |
| 793            | 17        | 63563833        | 63564032        | Indel-enhancer        | 0.98        | 3.4E-06        |
| <b>2462</b>    | <b>17</b> | <b>63565183</b> | <b>63565382</b> | <b>Indel-enhancer</b> | <b>0.64</b> | <b>5.1E-03</b> |
| 662            | 17        | 63653599        | 63653798        | Right-enhancer        | 0.55        | 1.7E-02        |
| <b>RPB2</b>    |           |                 |                 |                       |             |                |
| 10938          | 17        | 63524026        | 63524225        | TTS                   | 0.97        | 4.6E-06        |
| 1989           | 17        | 63557149        | 63557348        | Promoter              | 1.03        | 7.5E-07        |
| 3767           | 17        | 63557594        | 63557793        | Promoter              | 1.10        | 7.4E-08        |

**Supplementary Table 2. AXIN2 VCM ATAC-seq peaks information.** ATAC-seq peaks overlapping the LCL AXIN2 VCM from Kumasaka et al., 2018<sup>9</sup>. Data obtained from the publicly available data files Peaks.bed.gz and lead\_caQTL\_variants.tsv.gz. All peaks have a probability of ~1 that rs143348853 is the chromatin accessibility QTL (caQTL) considering the peak as a caQTL (as determined by their P\_Lead values). In bold, the peak that overlaps with the indel. Peak id as denoted in the original publication. Genomic coordinates (1-based) are for hg19. Beta: effect size of the ALT allele. PMR: probability that the peak is a master regulator.

| Peak id       | Chr       | Start           | End             | Beta            | PMR          | LCL AXIN2 VCM feature |
|---------------|-----------|-----------------|-----------------|-----------------|--------------|-----------------------|
| 254424        | 17        | 63505100        | 63505624        | 0.30929         | 0            | Left-enhancer         |
| 254425        | 17        | 63506043        | 63506616        | 0.290475        | 0            | Left-enhancer         |
| 254426        | 17        | 63549291        | 63550123        | 0.45857         | 0            | Intra-enhancer1       |
| 254427        | 17        | 63552372        | 63553104        | 0.302549        | 0            | Intra-enhancer2       |
| 254428        | 17        | 63553326        | 63553847        | 0.608001        | 0            | Intra-enhancer2       |
| 254429        | 17        | 63556907        | 63558087        | 0.35991         | 0            | Promoter              |
| <b>254430</b> | <b>17</b> | <b>63559819</b> | <b>63560574</b> | <b>0.871128</b> | <b>0.997</b> | <b>Indel-enhancer</b> |
| 254431        | 17        | 63561327        | 63561856        | 0.503294        | 0            | Indel-enhancer        |
| 254432        | 17        | 63563620        | 63564228        | 0.798453        | 0            | Indel-enhancer        |
| 254433        | 17        | 63564898        | 63565968        | 0.760568        | 0            | Indel-enhancer        |
| 254434        | 17        | 63652737        | 63653484        | 0.192701        | 0            | Right-enhancer        |

**Supplementary Table 3. Oligonucleotide sequences.**

| <b>Sanger seq primers</b>        | <b>Forward (5'-3')</b>                               | <b>Reverse (5'-3')</b>                             |
|----------------------------------|------------------------------------------------------|----------------------------------------------------|
| AXIN2gt                          | ACCCGAGGAGTGCCAAGAGTAA                               | TGACCGAGAAGATCCAAACCAA                             |
| <b>qPCR primers</b>              | <b>Forward (5'-3')</b>                               | <b>Reverse (5'-3')</b>                             |
| AXIN2_mRNA                       | AAGTGCAAACCTTCGCCAAC                                 | ACAGGATCGCTCCTCTTGAA                               |
| HPRT1_mRNA                       | TGAGGATTTGGAAAGGGTGT                                 | AATCCAGCAGGTCAGCAAAG                               |
| <b>Genotyping</b>                | <b>Forward (5'-3')</b>                               | <b>Reverse (5'-3')</b>                             |
| rs143348853.genotype             | ATAAAAGTGTCTACCATATAAACAA                            | TTATTATTGACCGAGAAGATC                              |
| <b>Cloning gRNAs</b>             | <b>Forward (5'-3')</b>                               | <b>Reverse (5'-3')</b>                             |
| gRNA1                            | CACCGCCACAGAGGGTGTTATTAC                             | AAACGTAATAACACCCTCTGTGC                            |
| gRNA2                            | CACCGCTTGCTACAGTCGCAGCCAT                            | AAACATGGCTGCGACTGTAGCAAGC                          |
| doublegRNA                       | CTGCAGACAAATGGCTCTAGAGGTACCGAGGGCCTATTTCCCATGATT     | CCATTTACCGTAAGTTATGTAA<br>CGGGTACC                 |
| <b>CRISPR genotyping primers</b> | <b>Forward (5'-3')</b>                               | <b>Reverse (5'-3')</b>                             |
| Left_Right.gt                    | GCTGGCCATAAGACCCTCGT                                 | CCCAGGGAGCCCTTAGTCCT                               |
| CRISPR.background                | CGCAGGAACCCCTAGTGATG                                 | AGAACGTGGACTCCAACGTC                               |
| <b>SNP pulldown probes</b>       | <b>Forward (5'-3')</b>                               | <b>Reverse (5'-3')</b>                             |
| ALT_SNPpulldown (39bp)           | biotin-GAAAAATCAAACATCTAAAAA<br>TAAACAATGTTCAGAAA    | TTTCTGAACATTGTTTATTTTAT<br>GATGTTTTGATTTTTTC       |
| REF_SNPpulldown (44bp)           | biotin-GAAAAATCAAACATCTAAAT<br>CAAATAAACAATGTTCAGAAA | TTTCTGAACATTGTTTATTTTAT<br>ATTTTAGATGTTTTGATTTTTTC |
| <b>ChIP-qPCR</b>                 | <b>Forward (5'-3')</b>                               | <b>Reverse (5'-3')</b>                             |
| Negative control                 | GGTCATGCTGGTCTCGAACT                                 | ATCCTTCCCATGGAACACAG                               |
| Indel region                     | AACTTGGTCTTTGTGGGTGGT                                | GTCCTTTGGTTAAAGTTGAGCC<br>T                        |

|                                              |                                                                                                                                                         |                                                                                                                                                      |
|----------------------------------------------|---------------------------------------------------------------------------------------------------------------------------------------------------------|------------------------------------------------------------------------------------------------------------------------------------------------------|
| Positive control                             | CACACGAACCTTCCACGAG                                                                                                                                     | TCG TTCAGCTTTGTCTGACG                                                                                                                                |
| <b>Luciferase assay</b>                      | <b>Forward (5'-3')</b>                                                                                                                                  | <b>Reverse (5'-3')</b>                                                                                                                               |
| luciferase_rs143348853                       | AAATCGATAAGGATCCACCCCA<br>GGAGTGCCAAGAGTAAA                                                                                                             | TATCAGGGTTACTAGTTGACCG<br>AGAAGATCCAAACCAAA                                                                                                          |
| Luciferase_SNPcorrection_1stpiece            | ACAGAAATGTAGACAGAGGGG<br>TA                                                                                                                             | luciferase_rs143348853_Rev                                                                                                                           |
| Luciferase_SNPcorrection_2ndpiece            | luciferase_rs143348853_For                                                                                                                              | CCCTCTGTCTACATTTCTGTTC<br>CA                                                                                                                         |
| <b>NGS Capture-C</b>                         | <b>Left end indel fragment (5'-3')</b>                                                                                                                  | <b>Right end indel fragment (5'-3')</b>                                                                                                              |
| Capture oligos for the rs143348853 viewpoint | biotin-<br>CATGGACCCTCTTAGCCACCA<br>GCTCTGAGCTGGCCCAGGGC<br>CAAGAACACAGCCACCACCTT<br>TGGCCACCCCAGGAGTGCCA<br>AGAGTAAAAGTGTCACTGTGG<br>TTCCAGGGAGTCTTTGG | biotin-<br>TCTTTGTGGGTGGTTTTCTCT<br>CCTCCCAGTTGTCCCCACCGA<br>CCCGTCACTGCCTCCCCAAC<br>CAGCCCTAATCACTGTAGGCT<br>CAACTTTAACCAAGGACTAC<br>CTCATTATCCCATG |
| <b>AXIN2 ORF cloning</b>                     | <b>Forward (5'-3')</b>                                                                                                                                  | <b>Reverse (5'-3')</b>                                                                                                                               |
| AXIN2.ORF_1stpiece                           | TCGTGAGGATCCGCCACCATG<br>AGTAGCGCTATG                                                                                                                   | AAGAGACAGGCATGGGTTTGGT<br>G                                                                                                                          |
| AXIN2.ORF_2ndpiece                           | CAAACCCATGCCTGTCTCTTCC<br>A                                                                                                                             | GAATTCACGCGTTCAATCGATC<br>CGCTCCACTT                                                                                                                 |
| <b>GFP cloning</b>                           | <b>Forward (5'-3')</b>                                                                                                                                  | <b>Reverse (5'-3')</b>                                                                                                                               |
| pLV_GFP                                      | AGAGGATCCGCCGCCACCATG<br>GTGAGCAAGGGCG                                                                                                                  | ATTGTCGACTTACTTGTACAGC<br>TCGTCCATGCC                                                                                                                |



**Supplementary Table 4. Donor template construct used for CRISPR/Cas9.** DNA construct used as template for the recombination step during genome editing, integrated in the same plasmid harboring the Cas9-GFP and the dual gRNA cassette (**Supplementary Fig. 8c**). The sequence here corresponds to the REF allele. ALT, ALT.PU.1Δ and MEF2Δ donor template constructs have the same sequence except for the corresponding genotype change (see **Fig. 4e**).

```
gccttcagaactttaaacaatgcaagaattgtggctctatctaggtatccatagaaaaagagaaggaagaggctgggtggtggt
ggctcaccggtgtaatcccagcacttcgggaggccaaggcaggcggatcacctgaggtcaggcattcgagaccagcctgg
ccaacatagtgaaccctgtccctactaaaactacaaatattagccaggcgtggtggggggcgctgtagctccagctactcg
ggaggctgaggcaggagaatcattaaacacaggaggttaaggtgacgtgagcctgggagacagagcaagactccatct
caaaaaaaaaaagaaaaagaaaaaagaggaggaagatccaccacctgatctgctggaaaggggaggtggcag
gactgtgcccacctgcctcagcctaagggactgtgacaagggactagaaagctcttagacttttagtctaagactctgga
ctctggctcgtgggtgccatgacaggtggccgctctccccaaaacctgccttcggtgcccattgctgcagctccaggctctc
gacccaggcagccaggtggcataaagacagcagtagccctgaaatgtggccctgaagccagccaggaaggcca
gggaaagagtgtggccgatgactcatcttgccttaggacaactgctggtgtgaggaaaccagtgggctctaaaagccccg
gcctgctggtattctggggggtcagtgcccatggaccctcttagccaccagctctgagctggcccagggccaagaacacag
ccaccaccttggccaccccaggagtccaagagtaaaactgctactgtggtccaggagctcttgggcccacagagggtgtt
attacataactcgtatagcatacattatacgaagttatacatgtgacattgattattgactagttattaatagtaataattacgggg
tcattagttcatagcccatatatggagttccgcttacataactacggtaaatggcccgcctggctgaccgccaacgacccc
cgccattgacgtcaataatgacgtatgtcccatagtaacccaatagggactttcattgacgtcaatgggtggagattttacg
gtaaactgcccacttggcagtagatcaaggtatcatatgccaagtacgccccctattgacgtcaatgacggtaaatggcccgc
ctggcattatgccagtagatgaccttatgggacttctacttggcagtagatctacgtattagctcatgctattaccatggtgatg
cggttttggcagtagatcaatgggctggatagcgggtttagctcacggggatttccaagtctccaccccattgacgtcaatggga
gtttgtttggcaccaaaatcaacgggacttccaaaatgtcgtgaacaactccgccccattgacgcaaatgggcggtaggcgtg
tacggtgggaggtctataaagcagagctcgttttagtaaccgtcagatgcctggagacgccatccacgctgtttgacctcc
atagaagacaccgactctactagaggatctgccaccatggtgagcaagggcgaggaggataacatggccatcatcaagg
agttcatgcgcttcaaggtgcacatggagggctccgtgaacggccacgagttcgagatcgagggcgagggcgagggccgc
ccctacgagggcacccagaccgccaagctgaaggtgaccaaggggtggccccctgcccttcgctgggacatcctgtcccct
cagttcatgtacggctccaaggcctacgtgaagcaccgcccgcgacatccccgactacttgaagctgtccttccccgagggtt
caagtgaggagcgcgtgatgaacttcgaggacggcggcgtggtgaccgtgaccaggactcctcccctgaggacggcgagt
tcatctacaaggtgaagctgcgcggaccaactccccctccgacggccccgtaatgcagaagaagaccatgggctgggag
gcctctccgagcggatgtaccccaggacggcgcctgaagggcgagatcaagcagaggctgaagctgaaggacggc
ggccactacgacgctgaggtcaagaccacctacaaggccaagaagcccgtgacgtgcccggcgcctacaacgtcaaca
tcaagttgacatcacctcccacaacgaggactacaccatcgtggaacagtacgaacgcgagggccgactccacc
ggcggcatggacgagctgtacaagccccgggagggcagaggaagtcttcaacatgagggtgacgtggaggagaatcccg
gccctgaaccgagtacaagcccacggtgagcctcgcaccccgcgacgacgtcccaggggcgtacgcacccctgcggc
cgcgttcgcccactaccccgcacgcgccacaccgtcgatccggaccgccacatcgagcgggtcaccgagctgaagaa
ctctctcacgcgctcgggctcgcacatcggcaaggtgtgggtcgcggacgacggcgcgagggcgggtggcggctggaccag
ccggagagcgtcgaagcggggcggtgttcgcccagatcgccccgcgatggccgagttgagcgggttccggctggccgc
gcagcaacagatggaaggcctcctggcggcaccggcccaaggagcccgcgtggttctggccaccgtcggcgtctcgc
ccgaccaccagggaaggtctgggacgcgctcgtgctccccggagtgaggcggccgagcgcgcccgggtgcccg
cctctctggagacctccgccccgcaacctccccctctacgagcggctcggctcaccgtcaccgcccagctcaggtgcc
gaaggaccgcccacctggtgatgaccgcaagcccgggtgctaataagctagctggaatcaacctctggattacaaaattg
tgaaagattgactggtattcttaactatgtgtcctttacgctatgtggatagcgtctttaatgctttgatcatgctattgctcccg
tatggcttctatttctcctctgtataaatcctggtgtgtctctttataggagttgtggcccgtgtcaggcaacgtggcgtggtgt
gcactgttttctgacgcaacccccactggtggggcattgccaccacctgacgtccttccgggacttccgcttccccctcc
ctattgccacggcggaaactcatcgccgctgcttcccgcgtgctggacaggggctcggctgttgggactgacaattccgctg
```

gtgtgtcggggaagctgacgtccttccatggctgctcgccctgtgtgccacctggattctgcgcgggacgtccttctgctacgtc  
ccttcggccctcaatccagcggaccttccctcccgcggcctgctgccggctctgcggcctctccgcgtcttcgccttcgccctca  
gacgagtcggatctcccttgggcccctccccgcgctcgctgatcagcctcgactgtgccttctagttgccagccatctgttgtt  
gcccctccccgtgccttcttgaccctggaagtgccactcccactgtccttccaataaaaatgaggaaattgcatcgattgt  
ctgagtaggtgcattctattctggggggtggggcaggacagcaaggggaggattgggaagacaatagcaggcat  
gctggggatgcggtgggtctatgggggacctataacttcgtatagcatacattatacgaagttattggaacagaaaatgtagac  
agaggggatggattgccataaaagtgtctaccatataaacaacagtaaagtcacacacacacacacacacacacacacacaca  
cacacacacacacacacaatgtggggggtgggggagagagaaaaatcaaacatctaaaatcaaaataaacaatgttca  
gaaaaaagaggtttcaaaaaggaagtggaaacttggtcttgtgggtggtttcctctcctcccagttgtccccaccgaccctgc  
actgcctccccaaccagccctaatcactgtaggctcaacttaaccaaaaggactacctcattatcggtaccctgcgactgtag  
caagaggggactgggactgggactggggaccaggagcaagggccggttggttggatcttctcggtaataataactgct  
ctgagggccgggtgcagtggtcatgctgtaatcccagcactttgggaggccaaggcagggtggatcacctgaggttagga  
gttcgagaccagcctgaccgacatggagaaactcctctactaaaatacaaaaattagtcaggcatggtggcgatacctg  
taatcccagctacttgagaggcggaggcaggagaatcgctgaaccaggagacggaggtgtggtgagccgagatcgtg  
ccattgcactccagcctgggcaacaagagcaaacctcctcaaaaaataaataaaaaataactcctctgagagcat  
ggttccagaacaggtgctcgggtcactttagggcagtgactccctccaccatcaccccctggcctgtccccttctacagctttat  
atctggtgggacacttccctcccagcaggaggctgggccaagtactgaaagccctctctagcctctgggtctctgactact  
gttgataatattctagaggagaatccaaagtcctgtgcttatagcagcccgtttctcaagatagcacgttttccattttcccctgtc  
cctggcagcagcgctatcatgtgacttgttgaatcctgcacggtgcctggaaactggaaagcaaggtgatggattctgcaca  
tgctcactcgcggccctccacctttaaagaaaaaccctacggaggataaacagtcactttgcctaagtgcagacaagtt  
taataaagcagagagtgattcttctgctggaattatatactgggctgaaatc

**Supplementary Table 5. ORCA segment coordinates.** Genomic coordinates (1-based, hg19) for the 25 8-kb segments used for ORCA.

| Chromosome | Start    | End      | Segment   | LCL <i>AXIN2</i> VCM feature |
|------------|----------|----------|-----------|------------------------------|
| chr17      | 63486119 | 63494121 | segment1  |                              |
| chr17      | 63494123 | 63502125 | segment2  |                              |
| chr17      | 63502127 | 63510129 | segment3  | Left-enhancer                |
| chr17      | 63510131 | 63518133 | segment4  |                              |
| chr17      | 63518135 | 63526137 | segment5  | TTS                          |
| chr17      | 63526139 | 63534141 | segment6  |                              |
| chr17      | 63534143 | 63542145 | segment7  | H3K4me1 satellite            |
| chr17      | 63542147 | 63550149 | segment8  | Intra-enhancer               |
| chr17      | 63550151 | 63558153 | segment9  | Intra-enhancer and TSS       |
| chr17      | 63558155 | 63566157 | segment10 | Indel-enhancer               |
| chr17      | 63566159 | 63574161 | segment11 |                              |
| chr17      | 63574163 | 63582165 | segment12 |                              |
| chr17      | 63582167 | 63590169 | segment13 | H3K4me1 satellite            |
| chr17      | 63590171 | 63598173 | segment14 | H3K4me1 satellite            |
| chr17      | 63598175 | 63606177 | segment15 |                              |
| chr17      | 63606179 | 63614181 | segment16 |                              |
| chr17      | 63614183 | 63622185 | segment17 |                              |
| chr17      | 63622187 | 63630189 | segment18 |                              |
| chr17      | 63630191 | 63638193 | segment19 |                              |
| chr17      | 63638195 | 63646197 | segment20 |                              |
| chr17      | 63646199 | 63654201 | segment21 | Right-enhancer               |
| chr17      | 63654203 | 63662205 | segment22 | Right-enhancer               |
| chr17      | 63662207 | 63670209 | segment23 |                              |
| chr17      | 63670211 | 63678213 | segment24 |                              |
| chr17      | 63678215 | 63686118 | segment25 |                              |

## SUPPLEMENTARY REFERENCES

1. Robinson, J. T. *et al.* Integrative genomics viewer. *Nat. Biotechnol.* **29**, 24–26 (2011).
2. Beekman, R. *et al.* The reference epigenome and regulatory chromatin landscape of chronic lymphocytic leukemia. *Nat. Med.* **24**, 868–880 (2018).
3. Waszak, S. M. *et al.* Population Variation and Genetic Control of Modular Chromatin Architecture in Humans. *Cell* **162**, 1039–1050 (2015).
4. Delaneau, O. *et al.* Chromatin three-dimensional interactions mediate genetic effects on gene expression. *Science* **364**, (2019).
5. Oakes, C. C. *et al.* DNA methylation dynamics during B cell maturation underlie a continuum of disease phenotypes in chronic lymphocytic leukemia. *Nat. Genet.* **48**, 253–264 (2016).
6. Ramsay, A. J. *et al.* Next-generation sequencing reveals the secrets of the chronic lymphocytic leukemia genome. *Clin. Transl. Oncol.* **15**, 3–8 (2013).
7. Puente, X. S. *et al.* Non-coding recurrent mutations in chronic lymphocytic leukaemia. *Nature* **526**, 519–24 (2015).
8. Tang, Z. *et al.* CTCF-Mediated Human 3D Genome Architecture Reveals Chromatin Topology for Transcription. *Cell* **163**, 1611–1627 (2015).
9. Kumasaka, N., Knights, A. J. & Gaffney, D. J. High-resolution genetic mapping of putative causal interactions between regions of open chromatin. *Nat. Genet.* 1–1 (2018)  
doi:10.1038/s41588-018-0278-6.
