# Supplementary material for: A leukemia-protective germline variant mediates chromatin module formation via transcription factor nucleation
Source: PubMed Central journal article supplement (PMC9018852; doi:10.1038/s41467-022-29625-6), 2022-04-19
Supplement: 41467_2022_29625_MOESM2_ESM.pdf [file 41467_2022_29625_MOESM2_ESM.pdf]

## **Description of Supplementary Data Files**

**Supplementary Data 1. DNA pulldown mass spectrometry results.** List of detected proteins, the log<sub>2</sub> normalized peptide counts for the three replicates and the log<sub>2</sub> peptide fold change of ALT over REF oligos; sorted by FDR from the differentially bound protein analysis. TFs are indicated (isTF column) according to Lambert et al., 2018<sup>1</sup> annotation.

*Excel file.*

**Supplementary Data 2. TF allelic imbalance results.** Read counts information, *p* value from a two-sided binomial test and corrected *p* value (FDR) for all TFs from the ENCODE GM12878 cell line for each tested region in **Fig. 5b,c,d** and **Supplementary Fig. 8f,g**. Total reads are the sum of ALT- and REF-rs143348853 haplotype reads. Values used for plotting are also shown (log<sub>2</sub> fold change of ALT reads percentage of a TF over the ALT reads percentage of the input). TFs are sorted by FDR. TFs with less than 6 total reads were discarded from the statistical test (as indicated by NA). Input ChIP-seq reads for each region are indicated at the bottom.

*Excel file.*

**Supplementary Data 3. ENCODE GM12878 ChIP-seq metadata.** ChIP-seq fastq files downloaded and used to perform the TF density and allelic imbalance analyses.

*Excel file.*

**Supplementary Data 4. ORCA barcode sequences with genomic coordinates.** DNA probe sequences used to perform ORCA on the *AXIN2* VCM. Genomic coordinates denoted as hg19.

*Excel file.*

## **SUPPLEMENTARY REFERENCES**

1. Lambert, S. A. *et al.* The Human Transcription Factors. *Cell* **172**, 650–665 (2018).
